# Supplementary material for: Hidden cytotoxicity and mitochondrial dysfunction in 3D-printing polymers: evidence from FLEX, PETG and PC
Source: Research Square preprint supplement (doi:10.21203/rs.3.rs-8095943/v1), 2025-12-31
Supplement: Supplementary file 1 [file 905e9b7d78280604600bba4a.docx]

**Supplementary data**

**Hidden cytotoxicity and mitochondrial dysfunction in 3D-printing polymers: evidence from FLEX, PETG and PC.**

# Document content

[Document content 1](#_Toc212807620)

[1. Supplementary data description 1](#_Toc212807621)

[2. 3D print filament material identification (ID) 1](#_Toc212807622)

[3. RAW DATA - CELL PROLIFERATION AND CELL VIABILITY 2](#_Toc212807623)

[4. RAW DATA - HR Respirometry and Citrate synthase 22](#_Toc212807624)

[5. STATISTICS 25](#_Toc212807625)

[6. Graphical representation of RAW data 32](#_Toc212807626)

# Supplementary data description

| CC | Cell count in single well (96) (bb) |
| --- | --- |
| FLO | Single well (96) florescence in FU (NucBlue) |
| SCF | Single cell fluorescent in FU (NucBlue) |
| ABS | Single well (96) absorbance (Prestoblue) |
| %RED | Resazurin to resorufin reduction rate (Prestoblue) |
| SCPB | Single cell resazurin to resorufin reduction rate (Prestoblue) |

# 3D print filament material identification (ID)

| **Material ID** |  | **Polymer** |  | **Filament type** |  | **Print temperature** | **Producer** |
| --- | --- | --- | --- | --- | --- | --- | --- |
|  |  |  |  |  |  |  |  |
| **F1** |  | PLA |  | Extrafill Crystal Clear |  | 220/60 | Fillamentum |
| **F2** |  | PLA |  | Extrafill Trafic White |  | 220/60 | Fillamentum |
| **F3** |  | PLA |  | Extrafill Trafic Black |  | 220/60 | Fillamentum |
| **F4** |  | PLA |  | Extrafill Natural |  | 220/60 | Fillamentum |
|  |  |  |  |  |  |  |  |
| **F5** |  | CPE |  | HG100 Extrafill Natural |  | 270/90 | Fillamentum |
| **F6** |  | ABS |  | Extrafill Black |  | 240/110 | Fillamentum |
| **F7** |  | ASA |  | Extrafill Natural |  | 260/110 | Fillamentum |
| **F8** |  | ABS |  | Extrafill Natural |  | 240/110 | Fillamentum |
|  |  |  |  |  |  |  |  |
| **F9** |  | ABS |  | Extrafill Transparent |  | 240/110 | Fillamentum |
| **F10** |  | FLEX |  | A98* Trafic White |  | 240/50 | Fillamentum |
| **F11** |  | PC-ABS |  | Natural |  | 270/110 | Fillamentum |
| **P1** |  | PLA |  | Jet Black |  | 225/60 | Prusament |
|  |  |  |  |  |  |  |  |
| **P2** |  | PETG |  | PETG Jet Black |  | 250/90 | Prusament |
| **P3** |  | PC |  | Blend |  | 275/115 | Prusament |
| **S1** |  | ABS |  | MEDICAL |  | 240/100 | Smartfill |
| **V1** |  | PP |  | PP transparent |  | 240/80 | Verbatim |

# RAW DATA - CELL PROLIFERATION AND CELL VIABILITY

Following tables contain the complete raw data collected from the untreated control group (CTRL) and all polymer exposure conditions after 24 hours and 7 days. The experiments utilized Human Dermal Fibroblasts (HDFs) in a 96-well format. Columns are defined as follows: CC represents the total Cell Count measured via brightfield (BB) microscopy; FLO is the total NucBlue Fluorescence Units (FU) per well; SCF is the normalized Single-Cell Fluorescence in FU (NucBlue), reflecting membrane integrity per cell; ABS is the single-well Absorbance from the PrestoBlue metabolic assay; %RED is the calculated percentage of Resazurin to Resorufin reduction rate, reflecting metabolic activity per well; and SCPB represents the Single-Cell reduction rate (PrestoBlue) normalized per cell.

## Untreated cells CTRL1 (for F1, F2, F3, and F4)

| **Short-term exposition (24h)** | | | | | | |
| --- | --- | --- | --- | --- | --- | --- |
|  | CC | FLO | SCF | ABS | %RED | SCPB |
| Units | bb | FU | FU | AU | % | 10-3 |
| **MEAN** | **4905** | **180704** | **36,840** | **0,160** | **24,200** | **4,936** |
| **SD** | **459** | **31872** | **5,434** | **0,018** | **2,484** | **0,247** |
|  | 3815 | 128933 | 33,796 | 0,123 | 19,074 | 5,000 |
|  | 5248 | 145744 | 27,771 | 0,163 | 24,244 | 4,620 |
|  | 5224 | 152471 | 29,187 | 0,175 | 26,638 | 5,099 |
|  | 4810 | 163106 | 33,910 | 0,166 | 25,066 | 5,211 |
|  | 5168 | 169761 | 32,848 | 0,177 | 26,343 | 5,097 |
|  | 5209 | 189306 | 36,342 | 0,176 | 26,438 | 5,075 |
|  | 5217 | 179319 | 34,372 | 0,167 | 24,971 | 4,787 |
|  | 5101 | 196007 | 38,425 | 0,153 | 22,978 | 4,505 |
|  | 4034 | 136789 | 33,909 | 0,126 | 19,475 | 4,828 |
|  | 5379 | 180918 | 33,634 | 0,158 | 23,927 | 4,448 |
|  | 5282 | 234723 | 44,438 | 0,182 | 27,240 | 5,157 |
|  | 4500 | 174638 | 38,808 | 0,139 | 21,353 | 4,745 |
|  | 5196 | 235726 | 45,367 | 0,178 | 26,987 | 5,194 |
|  | 4882 | 216236 | 44,293 | 0,162 | 24,655 | 5,050 |
|  | 4702 | 205668 | 43,741 | 0,157 | 23,969 | 5,098 |
|  | 4713 | 181917 | 38,599 | 0,160 | 23,843 | 5,059 |
| **Long-term exposition (7 days)** | | | | | | |
|  | CC | FLO | SCF | ABS | %RED | SCPB |
| Units | bb | FU | FU | AU | % | 10-3 |
| **MEAN** | **10002** | **411309** | **41,136** | **0,322** | **49,854** | **4,987** |
| **SD** | **232** | **21269** | **2,232** | **0,014** | **3,840** | **0,406** |
|  | 10131 | 434468 | 42,885 | 0,348 | 54,752 | 5,404 |
|  | 10262 | 415452 | 40,485 | 0,319 | 51,115 | 4,981 |
|  | 10116 | 437179 | 43,217 | 0,336 | 49,806 | 4,924 |
|  | 9796 | 466017 | 47,572 | 0,350 | 55,065 | 5,621 |
|  | 9915 | 416397 | 41,997 | 0,328 | 53,246 | 5,370 |
|  | 10193 | 418045 | 41,013 | 0,320 | 42,440 | 4,164 |
|  | 9746 | 381932 | 39,189 | 0,314 | 50,131 | 5,144 |
|  | 9897 | 403668 | 40,787 | 0,326 | 51,370 | 5,190 |
|  | 10468 | 396087 | 37,838 | 0,305 | 48,694 | 4,652 |
|  | 10212 | 399337 | 39,105 | 0,311 | 50,270 | 4,923 |
|  | 10160 | 419130 | 41,253 | 0,311 | 47,432 | 4,668 |
|  | 10008 | 406717 | 40,639 | 0,312 | 50,223 | 5,018 |
|  | 10002 | 397524 | 39,744 | 0,319 | 51,810 | 5,180 |
|  | 9696 | 405521 | 41,824 | 0,305 | 40,528 | 4,180 |
|  | 9746 | 383671 | 39,367 | 0,314 | 49,783 | 5,108 |
|  | 9688 | 399796 | 41,267 | 0,324 | 50,999 | 5,264 |

1. Table shows the raw data results of methods used on untreated (CTRL) after 24h and 7th day.

## F1 (PLA; Extrafill Crystal Clear; Fillamentum)

| **Short-term exposition (24h)** | | | | | | |
| --- | --- | --- | --- | --- | --- | --- |
|  | CC | FLO | SCF | ABS | %RED | SCPB |
| Units | bb | FU | FU | AU | % | 10-3 |
| **MEAN** | **4795** | **180636** | **37,730** | **0,173** | **25,847** | **5,410** |
| **SD** | **524** | **23568** | **3,921** | **0,016** | **2,322** | **0,334** |
|  | 3723 | 124844 | 33,533 | 0,137 | 20,752 | 5,574 |
|  | 5232 | 186268 | 35,602 | 0,188 | 27,725 | 5,299 |
|  | 5329 | 195343 | 36,657 | 0,196 | 28,864 | 5,416 |
|  | 4491 | 198583 | 44,218 | 0,183 | 27,356 | 6,091 |
|  | 5314 | 177585 | 33,418 | 0,176 | 26,332 | 4,955 |
|  | 5113 | 212360 | 41,533 | 0,182 | 27,240 | 5,328 |
|  | 4429 | 188844 | 42,638 | 0,168 | 25,351 | 5,724 |
|  | 4470 | 174132 | 38,956 | 0,156 | 23,326 | 5,218 |
|  | 4008 | 125533 | 31,321 | 0,151 | 22,271 | 5,557 |
|  | 5272 | 181895 | 34,502 | 0,179 | 26,522 | 5,031 |
|  | 5318 | 187310 | 35,222 | 0,179 | 26,522 | 4,987 |
|  | 4536 | 191663 | 42,254 | 0,183 | 27,250 | 6,008 |
|  | 5397 | 184115 | 34,114 | 0,186 | 27,704 | 5,133 |
|  | 5052 | 197436 | 39,081 | 0,190 | 28,168 | 5,576 |
|  | 4415 | 178912 | 40,524 | 0,156 | 23,589 | 5,343 |
|  | 4622 | 185353 | 40,102 | 0,165 | 24,581 | 5,318 |
| **Long-term exposition (7 days)** | | | | | | |
|  | CC | FLO | SCF | ABS | %RED | SCPB |
| Units | bb | FU | FU | AU | % | 10-3 |
| **MEAN** | **9958** | **371237** | **37,278** | **0,322** | **48,088** | **4,836** |
| **SD** | **304** | **34026** | **3,204** | **0,014** | **4,504** | **0,489** |
|  | 9688 | 431975 | 44,589 | 0,348 | 52,748 | 5,445 |
|  | 10151 | 392229 | 38,639 | 0,319 | 51,602 | 5,083 |
|  | 10240 | 420503 | 41,065 | 0,336 | 46,552 | 4,546 |
|  | 10312 | 367450 | 35,633 | 0,350 | 51,416 | 4,986 |
|  | 9974 | 333886 | 33,476 | 0,328 | 47,026 | 4,715 |
|  | 10242 | 366279 | 35,762 | 0,320 | 37,262 | 3,638 |
|  | 9578 | 341896 | 35,696 | 0,314 | 48,254 | 5,038 |
|  | 9462 | 355379 | 37,559 | 0,326 | 48,741 | 5,151 |
|  | 10015 | 412913 | 41,229 | 0,305 | 50,223 | 5,015 |
|  | 9721 | 374947 | 38,571 | 0,311 | 47,061 | 4,841 |
|  | 10146 | 405864 | 40,002 | 0,311 | 50,779 | 5,005 |
|  | 9861 | 332293 | 33,698 | 0,312 | 48,127 | 4,881 |
|  | 10144 | 364190 | 35,902 | 0,319 | 55,042 | 5,426 |
|  | 10445 | 374076 | 35,814 | 0,305 | 40,158 | 3,845 |
|  | 9495 | 312855 | 32,949 | 0,314 | 44,721 | 4,710 |
|  | 9846 | 353050 | 35,857 | 0,324 | 49,702 | 5,048 |

1. Table shows the raw data results of methods used on cells after short-term (24h) and long-term (7 days) exposition by F1 (PLA) filament.

## F2 (PLA; Extrafill Trafic White; Fillamentum)

| **Short-term exposition (24h)** | | | | | | |
| --- | --- | --- | --- | --- | --- | --- |
|  | CC | FLO | SCF | ABS | %RED | SCPB |
| Units | bb | FU | FU | AU | % | 10-3 |
| **MEAN** | **4846** | **177937** | **36,766** | **0,173** | **25,835** | **5,346** |
| **SD** | **504** | **21305** | **3,080** | **0,017** | **2,438** | **0,337** |
|  | 3947 | 130626 | 33,095 | 0,159 | 23,463 | 5,944 |
|  | 5280 | 174185 | 32,990 | 0,178 | 26,301 | 4,981 |
|  | 5401 | 182535 | 33,797 | 0,183 | 27,039 | 5,006 |
|  | 4283 | 167611 | 39,134 | 0,166 | 24,803 | 5,791 |
|  | 5393 | 197260 | 36,577 | 0,191 | 28,390 | 5,264 |
|  | 5079 | 194512 | 38,297 | 0,185 | 27,535 | 5,421 |
|  | 4606 | 168699 | 36,626 | 0,163 | 24,507 | 5,321 |
|  | 4644 | 192718 | 41,498 | 0,169 | 25,415 | 5,473 |
|  | 4231 | 140232 | 33,144 | 0,156 | 23,062 | 5,451 |
|  | 5363 | 171002 | 31,886 | 0,178 | 26,301 | 4,904 |
|  | 5331 | 193091 | 36,220 | 0,194 | 28,791 | 5,401 |
|  | 4390 | 182002 | 41,458 | 0,167 | 25,288 | 5,760 |
|  | 5358 | 202538 | 37,801 | 0,199 | 29,582 | 5,521 |
|  | 5186 | 209412 | 40,380 | 0,191 | 28,653 | 5,525 |
|  | 4345 | 165405 | 38,068 | 0,137 | 20,910 | 4,812 |
|  | 4699 | 175167 | 37,278 | 0,156 | 23,326 | 4,964 |
| **Long-term exposition (7 days)** | | | | | | |
|  | CC | FLO | SCF | ABS | %RED | SCPB |
| Units | bb | FU | FU | AU | % | 10-3 |
| **MEAN** | **9970** | **355591** | **35,707** | **0,302** | **47,296** | **4,748** |
| **SD** | **350** | **25011** | **2,784** | **0,011** | **3,881** | **0,404** |
|  | 10203 | 405209 | 39,715 | 0,314 | 50,073 | 4,908 |
|  | 9544 | 347464 | 36,407 | 0,284 | 46,366 | 4,858 |
|  | 10447 | 378585 | 36,239 | 0,308 | 46,586 | 4,459 |
|  | 9551 | 330961 | 34,652 | 0,308 | 49,598 | 5,193 |
|  | 9736 | 326988 | 33,585 | 0,309 | 50,246 | 5,161 |
|  | 9971 | 361498 | 36,255 | 0,287 | 38,293 | 3,840 |
|  | 9865 | 328750 | 33,325 | 0,303 | 48,208 | 4,887 |
|  | 9983 | 359605 | 36,022 | 0,307 | 49,123 | 4,921 |
|  | 9750 | 403822 | 41,418 | 0,308 | 47,976 | 4,921 |
|  | 9903 | 348209 | 35,162 | 0,283 | 46,355 | 4,681 |
|  | 9432 | 375107 | 39,770 | 0,304 | 46,192 | 4,897 |
|  | 10186 | 349239 | 34,286 | 0,322 | 52,077 | 5,113 |
|  | 10804 | 323530 | 29,945 | 0,310 | 51,648 | 4,780 |
|  | 10187 | 361845 | 35,520 | 0,287 | 38,756 | 3,804 |
|  | 10017 | 342402 | 34,182 | 0,300 | 47,826 | 4,774 |
|  | 9943 | 346243 | 34,823 | 0,300 | 47,420 | 4,769 |

1. Table shows the raw data results of methods used on cells after short-term (24h) and long-term (7 days) exposition by F2 (PLA) filament.

## F3 (PLA; Extrafill Trafic Black; Fillamentum)

| **Short-term exposition (24h)** | | | | | | |
| --- | --- | --- | --- | --- | --- | --- |
|  | CC | FLO | SCF | ABS | %RED | SCPB |
| Units | bb | FU | FU | AU | % | 10-3 |
| **MEAN** | **4960** | **178126** | **35,960** | **0,169** | **25,293** | **5,122** |
| **SD** | **500** | **20592** | **2,700** | **0,014** | **2,038** | **0,359** |
|  | 3922 | 142431 | 36,316 | 0,154 | 22,935 | 5,848 |
|  | 5615 | 174690 | 31,111 | 0,171 | 25,277 | 4,502 |
|  | 5502 | 215005 | 39,078 | 0,198 | 29,413 | 5,346 |
|  | 4803 | 192947 | 40,172 | 0,176 | 26,385 | 5,493 |
|  | 5407 | 199815 | 36,955 | 0,184 | 27,630 | 5,110 |
|  | 5266 | 198878 | 37,766 | 0,173 | 26,090 | 4,954 |
|  | 4527 | 168951 | 37,321 | 0,146 | 22,060 | 4,873 |
|  | 4785 | 174296 | 36,425 | 0,151 | 22,640 | 4,731 |
|  | 4124 | 138397 | 33,559 | 0,156 | 23,273 | 5,643 |
|  | 5201 | 155821 | 29,960 | 0,169 | 25,151 | 4,836 |
|  | 5384 | 183575 | 34,096 | 0,183 | 27,250 | 5,061 |
|  | 4694 | 174761 | 37,231 | 0,173 | 25,879 | 5,513 |
|  | 5339 | 194251 | 36,383 | 0,175 | 26,427 | 4,950 |
|  | 5344 | 186150 | 34,833 | 0,177 | 26,396 | 4,939 |
|  | 4704 | 170890 | 36,329 | 0,155 | 23,421 | 4,979 |
|  | 4737 | 179164 | 37,822 | 0,164 | 24,465 | 5,165 |
| **Long-term exposition (7 days)** | | | | | | |
|  | CC | FLO | SCF | ABS | %RED | SCPB |
| Units | bb | FU | FU | AU | % | 10-3 |
| **MEAN** | **9911** | **380442** | **38,424** | **0,311** | **48,191** | **4,870** |
| **SD** | **457** | **26937** | **2,735** | **0,015** | **4,260** | **0,449** |
|  | 10109 | 420611 | 41,608 | 0,319 | 49,783 | 4,925 |
|  | 9631 | 389059 | 40,397 | 0,306 | 49,691 | 5,159 |
|  | 9888 | 396690 | 40,118 | 0,310 | 47,015 | 4,755 |
|  | 10080 | 384281 | 38,123 | 0,325 | 52,806 | 5,239 |
|  | 9883 | 369743 | 37,412 | 0,324 | 52,795 | 5,342 |
|  | 10905 | 375706 | 34,453 | 0,297 | 40,030 | 3,671 |
|  | 9570 | 321339 | 33,578 | 0,288 | 45,718 | 4,777 |
|  | 10000 | 361187 | 36,119 | 0,322 | 51,034 | 5,103 |
|  | 9626 | 431214 | 44,797 | 0,334 | 51,463 | 5,346 |
|  | 9607 | 379559 | 39,509 | 0,301 | 46,389 | 4,829 |
|  | 10163 | 388151 | 38,193 | 0,306 | 45,521 | 4,479 |
|  | 10568 | 406063 | 38,424 | 0,340 | 55,181 | 5,221 |
|  | 10369 | 375196 | 36,184 | 0,309 | 50,131 | 4,835 |
|  | 9575 | 382007 | 39,896 | 0,294 | 40,169 | 4,195 |
|  | 9558 | 360235 | 37,689 | 0,301 | 46,505 | 4,866 |
|  | 9038 | 346033 | 38,286 | 0,298 | 46,818 | 5,180 |

1. Table shows the raw data results of methods used on cells after short-term (24h) and long-term (7 days) exposition by F3 (PLA) filament.

## F4 (PLA; Extrafill Natural; Fillamentum)

| **Short-term exposition (24h)** | | | | | | |
| --- | --- | --- | --- | --- | --- | --- |
|  | CC | FLO | SCF | ABS | %RED | SCPB |
| Units | bb | FU | FU | AU | % | 10-3 |
| **MEAN** | **4934** | **173612** | **35,191** | **0,166** | **25,053** | **5,094** |
| **SD** | **457** | **19512** | **2,226** | **0,015** | **2,089** | **0,331** |
|  | 4202 | 135413 | 32,226 | 0,160 | 23,737 | 5,649 |
|  | 5240 | 152308 | 29,066 | 0,166 | 24,855 | 4,743 |
|  | 5241 | 190724 | 36,391 | 0,194 | 28,843 | 5,503 |
|  | 4667 | 175903 | 37,691 | 0,161 | 24,381 | 5,224 |
|  | 5297 | 190711 | 36,004 | 0,185 | 27,799 | 5,248 |
|  | 5196 | 192943 | 37,133 | 0,183 | 27,567 | 5,305 |
|  | 4480 | 154072 | 34,391 | 0,137 | 21,015 | 4,691 |
|  | 4754 | 169986 | 35,756 | 0,152 | 23,020 | 4,842 |
|  | 3735 | 134980 | 36,139 | 0,143 | 21,606 | 5,785 |
|  | 5276 | 170486 | 32,313 | 0,176 | 26,227 | 4,971 |
|  | 5053 | 183093 | 36,235 | 0,168 | 25,351 | 5,017 |
|  | 4968 | 180219 | 36,276 | 0,168 | 25,351 | 5,103 |
|  | 5134 | 187276 | 36,478 | 0,166 | 25,066 | 4,882 |
|  | 5356 | 193890 | 36,201 | 0,173 | 26,090 | 4,871 |
|  | 5195 | 186935 | 35,984 | 0,167 | 24,866 | 4,787 |
|  | 5143 | 178851 | 34,776 | 0,166 | 25,066 | 4,874 |
| **Long-term exposition (7 days)** | | | | | | |
|  | CC | FLO | SCF | ABS | %RED | SCPB |
| Units | bb | FU | FU | AU | % | 10-3 |
| **MEAN** | **10179** | **368851** | **36,209** | **0,302** | **47,126** | **4,630** |
| **SD** | **354** | **37055** | **3,067** | **0,021** | **3,707** | **0,335** |
|  | 10125 | 415703 | 41,057 | 0,318 | 49,945 | 4,933 |
|  | 9999 | 388839 | 38,888 | 0,313 | 49,656 | 4,966 |
|  | 10308 | 400973 | 38,899 | 0,325 | 49,331 | 4,786 |
|  | 9885 | 334926 | 33,882 | 0,275 | 44,930 | 4,545 |
|  | 9646 | 320510 | 33,227 | 0,258 | 42,301 | 4,385 |
|  | 9942 | 343275 | 34,528 | 0,295 | 44,640 | 4,490 |
|  | 10055 | 351958 | 35,003 | 0,290 | 44,756 | 4,451 |
|  | 10242 | 327567 | 31,983 | 0,270 | 37,864 | 3,697 |
|  | 10911 | 418878 | 38,390 | 0,329 | 52,273 | 4,791 |
|  | 9884 | 387260 | 39,180 | 0,308 | 49,366 | 4,995 |
|  | 10465 | 438796 | 41,930 | 0,328 | 50,119 | 4,789 |
|  | 10873 | 381945 | 35,128 | 0,302 | 49,413 | 4,545 |
|  | 10502 | 371561 | 35,380 | 0,288 | 45,544 | 4,337 |
|  | 10064 | 353677 | 35,143 | 0,320 | 49,389 | 4,908 |
|  | 9995 | 325564 | 32,573 | 0,299 | 45,266 | 4,529 |
|  | 9961 | 340183 | 34,151 | 0,311 | 49,227 | 4,942 |

1. Table shows the raw data results of methods used on cells after short-term (24h) and long-term (7 days) exposition by F4 (PLA) filament.

## Untreated cells CTRL2 (for F5, F6, F7, and F8)

| **Short-term exposition (24h)** | | | | | | |
| --- | --- | --- | --- | --- | --- | --- |
|  | CC | FLO | SCF | ABS | %RED | SCPB |
| Units | bb | FU | FU | AU | % | 10-3 |
| **MEAN** | **5009** | **183158** | **36,507** | **0,156** | **22,602** | **4,511** |
| **SD** | **499** | **23794** | **2,459** | **0,016** | **2,449** | **0,175** |
|  | 3713 | 125376 | 33,767 | 0,118 | 15,979 | 4,303 |
|  | 5127 | 175774 | 34,284 | 0,160 | 22,605 | 4,409 |
|  | 5400 | 183712 | 34,021 | 0,164 | 22,855 | 4,232 |
|  | 5274 | 178898 | 33,921 | 0,158 | 23,573 | 4,470 |
|  | 5048 | 184771 | 36,603 | 0,165 | 24,426 | 4,839 |
|  | 5477 | 204787 | 37,390 | 0,163 | 23,989 | 4,380 |
|  | 5436 | 200189 | 36,827 | 0,169 | 24,624 | 4,530 |
|  | 4989 | 184859 | 37,053 | 0,151 | 21,888 | 4,387 |
|  | 4161 | 140801 | 33,838 | 0,132 | 19,453 | 4,675 |
|  | 5160 | 179888 | 34,862 | 0,167 | 23,719 | 4,597 |
|  | 5356 | 214048 | 39,964 | 0,178 | 25,914 | 4,838 |
|  | 4590 | 190756 | 41,559 | 0,142 | 21,326 | 4,646 |
|  | 5535 | 207867 | 37,555 | 0,172 | 25,227 | 4,558 |
|  | 5181 | 207069 | 39,967 | 0,160 | 23,438 | 4,524 |
|  | 4745 | 165574 | 34,894 | 0,139 | 20,774 | 4,378 |
|  | 4949 | 186154 | 37,614 | 0,152 | 21,846 | 4,414 |
| **Long-term exposition (7 days)** | | | | | | |
|  | CC | FLO | SCF | ABS | %RED | SCPB |
| Units | bb | FU | FU | AU | % | 10-3 |
| **MEAN** | **10237** | **439748** | **42,970** | **0,370** | **52,409** | **5,124** |
| **SD** | **298** | **31874** | **3,053** | **0,024** | **3,504** | **0,374** |
|  | 10134 | 426875 | 42,123 | 0,392 | 54,410 | 5,369 |
|  | 10556 | 399003 | 37,799 | 0,354 | 50,113 | 4,747 |
|  | 10312 | 411136 | 39,870 | 0,378 | 53,736 | 5,211 |
|  | 10141 | 420996 | 41,514 | 0,391 | 55,401 | 5,463 |
|  | 10379 | 427711 | 41,209 | 0,373 | 53,052 | 5,111 |
|  | 10355 | 427505 | 41,285 | 0,377 | 53,352 | 5,152 |
|  | 9968 | 445083 | 44,651 | 0,352 | 50,355 | 5,052 |
|  | 10569 | 459597 | 43,485 | 0,343 | 44,415 | 4,202 |
|  | 9958 | 419072 | 42,084 | 0,396 | 55,611 | 5,585 |
|  | 10564 | 457146 | 43,274 | 0,369 | 52,694 | 4,988 |
|  | 9847 | 456140 | 46,323 | 0,397 | 56,412 | 5,729 |
|  | 10654 | 490370 | 46,027 | 0,395 | 56,338 | 5,288 |
|  | 10352 | 481091 | 46,473 | 0,364 | 52,062 | 5,029 |
|  | 10216 | 500941 | 49,035 | 0,386 | 55,190 | 5,402 |
|  | 9553 | 419301 | 43,892 | 0,327 | 47,090 | 4,929 |
|  | 10241 | 394000 | 38,473 | 0,328 | 48,312 | 4,718 |

1. Table shows the raw data results of methods used on untreated (CTRL) after 24h and 7th day

## F5 (CPE; HG100 Extrafill Natural; Fillamentum)

| **Short-term exposition (24h)** | | | | | | |
| --- | --- | --- | --- | --- | --- | --- |
|  | CC | FLO | SCF | ABS | %RED | SCPB |
| Units | bb | FU | FU | AU | % | 10-3 |
| **MEAN** | **4880** | **187243** | **38,458** | **0,169** | **24,702** | **5,081** |
| **SD** | **470** | **16410** | **2,236** | **0,015** | **2,199** | **0,410** |
|  | 4090 | 155645 | 38,055 | 0,157 | 22,002 | 5,379 |
|  | 4771 | 183266 | 38,412 | 0,166 | 24,209 | 5,074 |
|  | 5337 | 215356 | 40,352 | 0,200 | 28,483 | 5,337 |
|  | 4602 | 192025 | 41,726 | 0,167 | 24,343 | 5,290 |
|  | 5360 | 196038 | 36,574 | 0,177 | 25,747 | 4,804 |
|  | 5452 | 189006 | 34,667 | 0,176 | 25,373 | 4,654 |
|  | 4517 | 170196 | 37,679 | 0,147 | 21,482 | 4,756 |
|  | 4850 | 186588 | 38,472 | 0,163 | 23,365 | 4,817 |
|  | 4000 | 154001 | 38,500 | 0,142 | 22,158 | 5,540 |
|  | 5415 | 192031 | 35,463 | 0,185 | 27,287 | 5,039 |
|  | 5248 | 206123 | 39,276 | 0,184 | 26,808 | 5,108 |
|  | 4532 | 196119 | 43,274 | 0,182 | 27,880 | 6,152 |
|  | 4922 | 198158 | 40,260 | 0,179 | 25,895 | 5,261 |
|  | 5456 | 196685 | 36,049 | 0,171 | 24,696 | 4,526 |
|  | 4655 | 179131 | 38,481 | 0,154 | 22,439 | 4,820 |
|  | 4871 | 185522 | 38,087 | 0,160 | 23,074 | 4,737 |
| **Long-term exposition (7 days)** | | | | | | |
|  | CC | FLO | SCF | ABS | %RED | SCPB |
| Units | bb | FU | FU | AU | % | 10-3 |
| **MEAN** | **11024** | **464520** | **42,193** | **0,392** | **55,652** | **5,060** |
| **SD** | **614** | **33793** | **3,036** | **0,024** | **3,819** | **0,405** |
|  | 10024 | 392209 | 39,127 | 0,377 | 53,041 | 5,291 |
|  | 11402 | 463802 | 40,677 | 0,379 | 54,573 | 4,786 |
|  | 11318 | 455741 | 40,267 | 0,411 | 58,718 | 5,188 |
|  | 11924 | 489526 | 41,054 | 0,389 | 55,853 | 4,684 |
|  | 12154 | 513068 | 42,214 | 0,428 | 61,109 | 5,028 |
|  | 11606 | 448524 | 38,646 | 0,363 | 51,841 | 4,467 |
|  | 10642 | 403888 | 37,952 | 0,347 | 49,566 | 4,658 |
|  | 10710 | 478058 | 44,637 | 0,365 | 47,649 | 4,449 |
|  | 11031 | 465419 | 42,192 | 0,389 | 55,696 | 5,049 |
|  | 11089 | 426814 | 38,490 | 0,395 | 56,075 | 5,057 |
|  | 10892 | 510151 | 46,837 | 0,432 | 61,678 | 5,663 |
|  | 10770 | 486961 | 45,215 | 0,399 | 57,065 | 5,298 |
|  | 11105 | 488130 | 43,956 | 0,412 | 58,887 | 5,303 |
|  | 10596 | 476693 | 44,988 | 0,395 | 56,496 | 5,332 |
|  | 11279 | 465571 | 41,278 | 0,379 | 54,379 | 4,821 |
|  | 9834 | 467758 | 47,565 | 0,415 | 57,812 | 5,879 |

1. Table shows the raw data results of methods used on cells after short-term (24h) and long-term (7 days) exposition by F5 (CPE) filament.

## F6 (ABS; Extrafill Black; Fillamentum)

| **Short-term exposition (24h)** | | | | | | |
| --- | --- | --- | --- | --- | --- | --- |
|  | CC | FLO | SCF | ABS | %RED | SCPB |
| Units | bb | FU | FU | AU | % | 10-3 |
| **MEAN** | **5050** | **190366** | **37,696** | **0,179** | **25,886** | **5,139** |
| **SD** | **447** | **21164** | **2,618** | **0,017** | **2,407** | **0,395** |
|  | 4360 | 155342 | 35,629 | 0,161 | 23,032 | 5,283 |
|  | 5545 | 203315 | 36,666 | 0,207 | 29,752 | 5,366 |
|  | 5333 | 210223 | 39,419 | 0,200 | 28,899 | 5,419 |
|  | 4777 | 196883 | 41,215 | 0,171 | 24,956 | 5,224 |
|  | 5506 | 204368 | 37,117 | 0,186 | 27,037 | 4,910 |
|  | 5500 | 210514 | 38,275 | 0,175 | 25,570 | 4,649 |
|  | 4724 | 168571 | 35,684 | 0,153 | 22,325 | 4,726 |
|  | 5094 | 186906 | 36,691 | 0,166 | 24,020 | 4,715 |
|  | 4306 | 147489 | 34,252 | 0,167 | 23,719 | 5,508 |
|  | 5387 | 175585 | 32,594 | 0,172 | 24,759 | 4,596 |
|  | 5313 | 214811 | 40,431 | 0,203 | 29,190 | 5,494 |
|  | 4434 | 191000 | 43,076 | 0,187 | 27,047 | 6,100 |
|  | 5595 | 218018 | 38,967 | 0,198 | 28,722 | 5,134 |
|  | 5313 | 203020 | 38,212 | 0,190 | 27,339 | 5,146 |
|  | 4829 | 179742 | 37,221 | 0,163 | 23,781 | 4,925 |
|  | 4779 | 180069 | 37,679 | 0,166 | 24,020 | 5,026 |
| **Long-term exposition (7 days)** | | | | | | |
|  | CC | FLO | SCF | ABS | %RED | SCPB |
| Units | bb | FU | FU | AU | % | 10-3 |
| **MEAN** | **10119** | **437251** | **43,276** | **0,387** | **54,670** | **5,410** |
| **SD** | **400** | **38706** | **4,235** | **0,026** | **4,236** | **0,464** |
|  | 10473 | 374035 | 35,714 | 0,376 | 52,978 | 5,059 |
|  | 9868 | 447346 | 45,333 | 0,374 | 53,326 | 5,404 |
|  | 10937 | 462082 | 42,249 | 0,424 | 60,488 | 5,531 |
|  | 10095 | 471218 | 46,678 | 0,397 | 56,886 | 5,635 |
|  | 9987 | 419298 | 41,984 | 0,369 | 52,957 | 5,303 |
|  | 10049 | 437588 | 43,545 | 0,387 | 55,464 | 5,519 |
|  | 10197 | 413627 | 40,564 | 0,358 | 51,472 | 5,048 |
|  | 9805 | 463013 | 47,222 | 0,362 | 47,090 | 4,803 |
|  | 9720 | 374146 | 38,492 | 0,389 | 54,590 | 5,616 |
|  | 10155 | 387482 | 38,157 | 0,391 | 55,137 | 5,430 |
|  | 9835 | 498938 | 50,731 | 0,424 | 60,066 | 6,107 |
|  | 9864 | 474189 | 48,073 | 0,418 | 59,529 | 6,035 |
|  | 9547 | 460706 | 48,257 | 0,419 | 59,592 | 6,242 |
|  | 10826 | 442361 | 40,861 | 0,406 | 57,560 | 5,317 |
|  | 9923 | 397286 | 40,037 | 0,341 | 48,765 | 4,914 |
|  | 10617 | 472701 | 44,523 | 0,362 | 48,828 | 4,599 |

1. Table shows the raw data results of methods used on cells after short-term (24h) and long-term (7 days) exposition by F6 (ABS) filament.

## F7 (ASA; Extrafill Natural; Fillamentum)

| **Short-term exposition (24h)** | | | | | | |
| --- | --- | --- | --- | --- | --- | --- |
|  | CC | FLO | SCF | ABS | %RED | SCPB |
| Units | bb | FU | FU | AU | % | 10-3 |
| **MEAN** | **5094** | **175096** | **34,365** | **0,158** | **23,169** | **4,560** |
| **SD** | **489** | **20273** | **2,170** | **0,014** | **2,020** | **0,258** |
|  | 4146 | 135794 | 32,753 | 0,139 | 20,098 | 4,848 |
|  | 5347 | 171429 | 32,061 | 0,164 | 23,895 | 4,469 |
|  | 5488 | 194481 | 35,438 | 0,171 | 25,008 | 4,557 |
|  | 4397 | 159877 | 36,360 | 0,150 | 22,085 | 5,023 |
|  | 5593 | 197269 | 35,271 | 0,176 | 26,049 | 4,657 |
|  | 5599 | 192057 | 34,302 | 0,153 | 22,585 | 4,034 |
|  | 4852 | 168313 | 34,689 | 0,141 | 20,899 | 4,307 |
|  | 4956 | 164444 | 33,181 | 0,145 | 21,305 | 4,299 |
|  | 4570 | 137044 | 29,988 | 0,153 | 22,012 | 4,817 |
|  | 5529 | 175030 | 31,657 | 0,173 | 24,977 | 4,517 |
|  | 5653 | 199105 | 35,221 | 0,184 | 26,652 | 4,715 |
|  | 4579 | 178018 | 38,877 | 0,152 | 22,106 | 4,828 |
|  | 5562 | 194229 | 34,921 | 0,168 | 24,509 | 4,407 |
|  | 5346 | 198007 | 37,038 | 0,172 | 25,123 | 4,699 |
|  | 4813 | 163638 | 33,999 | 0,141 | 20,795 | 4,321 |
|  | 5071 | 172807 | 34,077 | 0,155 | 22,605 | 4,458 |
| **Long-term exposition (7 days)** | | | | | | |
|  | CC | FLO | SCF | ABS | %RED | SCPB |
| Units | bb | FU | FU | AU | % | 10-3 |
| **MEAN** | **10603** | **481529** | **45,462** | **0,422** | **59,746** | **5,636** |
| **SD** | **346** | **41144** | **4,243** | **0,019** | **3,024** | **0,242** |
|  | 9996 | 390482 | 39,064 | 0,412 | 57,991 | 5,801 |
|  | 10327 | 454110 | 43,973 | 0,433 | 61,372 | 5,943 |
|  | 10828 | 455822 | 42,097 | 0,442 | 62,626 | 5,784 |
|  | 11020 | 462628 | 41,981 | 0,445 | 62,973 | 5,714 |
|  | 10587 | 459853 | 43,436 | 0,424 | 60,382 | 5,703 |
|  | 10506 | 464973 | 44,258 | 0,434 | 61,804 | 5,883 |
|  | 10986 | 471524 | 42,920 | 0,396 | 56,980 | 5,187 |
|  | 10190 | 507863 | 49,839 | 0,389 | 53,484 | 5,249 |
|  | 10947 | 440189 | 40,211 | 0,423 | 59,319 | 5,419 |
|  | 11084 | 475512 | 42,901 | 0,436 | 61,667 | 5,564 |
|  | 10640 | 537950 | 50,559 | 0,433 | 61,899 | 5,818 |
|  | 10712 | 545694 | 50,942 | 0,452 | 64,206 | 5,994 |
|  | 10877 | 500307 | 45,997 | 0,432 | 61,467 | 5,651 |
|  | 10449 | 517542 | 49,530 | 0,398 | 56,633 | 5,420 |
|  | 10458 | 482817 | 46,167 | 0,398 | 56,527 | 5,405 |
|  | 10039 | 537190 | 53,510 | 0,416 | 56,612 | 5,639 |

1. Table shows the raw data results of methods used on cells after short-term (24h) and long-term (7 days) exposition by F7 (ASA) filament.

## F8 (ABS; Extrafill Natural; Fillamentum)

| **Short-term exposition (24h)** | | | | | | |
| --- | --- | --- | --- | --- | --- | --- |
|  | CC | FLO | SCF | ABS | %RED | SCPB |
| Units | bb | FU | FU | AU | % | 10-3 |
| **MEAN** | **5053** | **192613** | **38,077** | **0,177** | **25,533** | **5,068** |
| **SD** | **454** | **21565** | **2,018** | **0,014** | **1,939** | **0,299** |
|  | 4441 | 163972 | 36,922 | 0,173 | 24,665 | 5,554 |
|  | 5431 | 191100 | 35,187 | 0,199 | 28,421 | 5,233 |
|  | 5233 | 197470 | 37,736 | 0,192 | 27,724 | 5,298 |
|  | 4402 | 170124 | 38,647 | 0,167 | 24,187 | 5,494 |
|  | 5415 | 205815 | 38,008 | 0,184 | 26,652 | 4,922 |
|  | 5416 | 203699 | 37,611 | 0,174 | 25,196 | 4,652 |
|  | 4631 | 179761 | 38,817 | 0,157 | 22,990 | 4,964 |
|  | 5126 | 197577 | 38,544 | 0,173 | 25,185 | 4,913 |
|  | 3898 | 137339 | 35,233 | 0,147 | 21,066 | 5,404 |
|  | 5315 | 216427 | 40,720 | 0,184 | 26,340 | 4,956 |
|  | 5221 | 221120 | 42,352 | 0,194 | 28,161 | 5,394 |
|  | 5315 | 208145 | 39,162 | 0,177 | 25,643 | 4,825 |
|  | 5214 | 212643 | 40,783 | 0,185 | 26,819 | 5,144 |
|  | 5349 | 198328 | 37,078 | 0,184 | 26,548 | 4,963 |
|  | 5233 | 187939 | 35,914 | 0,166 | 24,124 | 4,610 |
|  | 5212 | 190355 | 36,522 | 0,171 | 24,800 | 4,758 |
| **Long-term exposition (7 days)** | | | | | | |
|  | CC | FLO | SCF | ABS | %RED | SCPB |
| Units | bb | FU | FU | AU | % | 10-3 |
| **MEAN** | **10286** | **434618** | **42,322** | **0,384** | **54,176** | **5,282** |
| **SD** | **600** | **30266** | **3,063** | **0,017** | **2,758** | **0,375** |
|  | 10120 | 403897 | 39,911 | 0,391 | 55,401 | 5,474 |
|  | 10361 | 429279 | 41,432 | 0,373 | 53,262 | 5,141 |
|  | 10036 | 465973 | 46,430 | 0,400 | 57,075 | 5,687 |
|  | 11953 | 472827 | 39,557 | 0,395 | 56,443 | 4,722 |
|  | 10398 | 433798 | 41,719 | 0,400 | 57,444 | 5,525 |
|  | 9863 | 485633 | 49,238 | 0,397 | 56,517 | 5,730 |
|  | 10130 | 400144 | 39,501 | 0,348 | 49,839 | 4,920 |
|  | 11490 | 474069 | 41,259 | 0,374 | 50,640 | 4,407 |
|  | 9817 | 420488 | 42,833 | 0,406 | 56,664 | 5,772 |
|  | 10117 | 394944 | 39,038 | 0,381 | 53,505 | 5,289 |
|  | 10246 | 405690 | 39,595 | 0,396 | 56,190 | 5,484 |
|  | 10124 | 417942 | 41,282 | 0,393 | 55,580 | 5,490 |
|  | 10360 | 434577 | 41,948 | 0,395 | 55,759 | 5,382 |
|  | 9752 | 418816 | 42,947 | 0,368 | 51,841 | 5,316 |
|  | 9904 | 420654 | 42,473 | 0,352 | 49,829 | 5,031 |
|  | 9900 | 475160 | 47,996 | 0,377 | 50,829 | 5,134 |

1. Table shows the raw data results of methods used on cells after short-term (24h) and long-term (7 days) exposition by F8 (ABS) filament.

## Untreated cells CTRL3 (for F9, F10, F11, and P1)

| **Short-term exposition (24h)** | | | | | | |
| --- | --- | --- | --- | --- | --- | --- |
|  | CC | FLO | SCF | ABS | %RED | SCPB |
| Units | bb | FU | FU | AU | % | 10-3 |
| **MEAN** | **5051** | **181384** | **35,895** | **0,174** | **24,554** | **4,873** |
| **SD** | **477** | **25226** | **3,531** | **0,018** | **2,330** | **0,321** |
|  | 3757 | 132009 | 35,137 | 0,136 | 19,386 | 5,160 |
|  | 5273 | 174909 | 33,171 | 0,182 | 25,280 | 4,794 |
|  | 5260 | 159797 | 30,380 | 0,186 | 25,929 | 4,929 |
|  | 5288 | 176064 | 33,295 | 0,193 | 27,116 | 5,128 |
|  | 5296 | 178145 | 33,638 | 0,184 | 25,959 | 4,902 |
|  | 5416 | 193801 | 35,783 | 0,189 | 26,669 | 4,924 |
|  | 5365 | 185505 | 34,577 | 0,175 | 24,955 | 4,651 |
|  | 5174 | 191036 | 36,922 | 0,151 | 21,668 | 4,188 |
|  | 4161 | 135149 | 32,480 | 0,162 | 22,642 | 5,442 |
|  | 5211 | 177937 | 34,146 | 0,181 | 25,270 | 4,849 |
|  | 5359 | 220720 | 41,187 | 0,188 | 26,304 | 4,908 |
|  | 4546 | 190901 | 41,993 | 0,159 | 22,865 | 5,030 |
|  | 5277 | 217658 | 41,247 | 0,195 | 27,491 | 5,210 |
|  | 5287 | 215209 | 40,705 | 0,186 | 26,385 | 4,991 |
|  | 5131 | 178135 | 34,717 | 0,157 | 22,642 | 4,413 |
|  | 5013 | 175167 | 34,943 | 0,153 | 22,297 | 4,448 |
| **Long-term exposition (7 days)** | | | | | | |
|  | CC | FLO | SCF | ABS | %RED | SCPB |
| Units | bb | FU | FU | AU | % | 10-3 |
| **MEAN** | **10430** | **412982** | **39,779** | **0,355** | **53,701** | **5,181** |
| **SD** | **920** | **32100** | **3,634** | **0,018** | **3,062** | **0,485** |
|  | 9786 | 380981 | 38,931 | 0,371 | 54,691 | 5,589 |
|  | 10091 | 358109 | 35,488 | 0,330 | 50,035 | 4,958 |
|  | 9912 | 392813 | 39,630 | 0,378 | 57,282 | 5,779 |
|  | 10037 | 445622 | 44,398 | 0,368 | 56,025 | 5,582 |
|  | 10191 | 418730 | 41,088 | 0,365 | 55,500 | 5,446 |
|  | 12458 | 465456 | 37,362 | 0,369 | 54,670 | 4,388 |
|  | 10263 | 454287 | 44,265 | 0,362 | 55,085 | 5,367 |
|  | 10752 | 422557 | 39,300 | 0,331 | 48,187 | 4,482 |
|  | 9412 | 395216 | 41,991 | 0,347 | 56,152 | 5,966 |
|  | 9303 | 396829 | 42,656 | 0,334 | 51,760 | 5,564 |
|  | 11582 | 442243 | 38,184 | 0,339 | 57,406 | 4,956 |
|  | 9574 | 451404 | 47,149 | 0,347 | 50,808 | 5,307 |
|  | 10393 | 396682 | 38,168 | 0,381 | 49,490 | 4,762 |
|  | 11663 | 424685 | 36,413 | 0,334 | 51,978 | 4,457 |
|  | 11559 | 383665 | 33,192 | 0,377 | 57,824 | 5,003 |
|  | 9896 | 378440 | 38,242 | 0,344 | 52,322 | 5,287 |

1. Table shows the raw data results of methods used on untreated (CTRL) after 24h and 7th day

## F9 (ABS; Extrafill Transparent; Fillamentum)

| **Short-term exposition (24h)** | | | | | | |
| --- | --- | --- | --- | --- | --- | --- |
|  | CC | FLO | SCF | ABS | %RED | SCPB |
| Units | bb | FU | FU | AU | % | 10-3 |
| **MEAN** | **4933** | **190364** | **38,582** | **0,186** | **26,099** | **5,313** |
| **SD** | **505** | **23345** | **2,743** | **0,018** | **2,516** | **0,450** |
|  | 3940 | 138770 | 35,221 | 0,159 | 22,206 | 5,636 |
|  | 5296 | 207917 | 39,259 | 0,212 | 29,439 | 5,559 |
|  | 5268 | 207475 | 39,384 | 0,207 | 28,678 | 5,444 |
|  | 4537 | 175296 | 38,637 | 0,186 | 26,132 | 5,760 |
|  | 5235 | 201054 | 38,406 | 0,208 | 29,094 | 5,558 |
|  | 5398 | 214611 | 39,758 | 0,193 | 27,167 | 5,033 |
|  | 5262 | 182417 | 34,667 | 0,172 | 24,316 | 4,621 |
|  | 4974 | 176155 | 35,415 | 0,172 | 24,265 | 4,878 |
|  | 3897 | 145022 | 37,214 | 0,153 | 21,486 | 5,513 |
|  | 5068 | 213838 | 42,194 | 0,205 | 28,658 | 5,655 |
|  | 5232 | 214201 | 40,941 | 0,201 | 28,364 | 5,421 |
|  | 4228 | 191742 | 45,351 | 0,184 | 26,467 | 6,260 |
|  | 5379 | 210571 | 39,147 | 0,193 | 27,319 | 5,079 |
|  | 5243 | 197936 | 37,752 | 0,187 | 26,396 | 5,034 |
|  | 5134 | 185793 | 36,189 | 0,167 | 23,555 | 4,588 |
|  | 4844 | 183019 | 37,783 | 0,170 | 24,042 | 4,963 |
| **Long-term exposition (7 days)** | | | | | | |
|  | CC | FLO | SCF | ABS | %RED | SCPB |
| Units | bb | FU | FU | AU | % | 10-3 |
| **MEAN** | **10277** | **413901** | **40,248** | **0,357** | **54,251** | **5,282** |
| **SD** | **320** | **43375** | **3,888** | **0,020** | **3,048** | **0,301** |
|  | 9660 | 279373 | 28,921 | 0,323 | 49,739 | 5,149 |
|  | 10272 | 391872 | 38,150 | 0,352 | 53,336 | 5,192 |
|  | 10509 | 419756 | 39,943 | 0,384 | 58,168 | 5,535 |
|  | 9861 | 413091 | 41,891 | 0,342 | 52,352 | 5,309 |
|  | 10200 | 439983 | 43,136 | 0,361 | 55,238 | 5,415 |
|  | 10586 | 428527 | 40,481 | 0,363 | 55,752 | 5,267 |
|  | 10069 | 433846 | 43,087 | 0,353 | 53,893 | 5,352 |
|  | 10480 | 397333 | 37,913 | 0,319 | 50,078 | 4,778 |
|  | 10799 | 398084 | 36,863 | 0,373 | 55,642 | 5,153 |
|  | 10353 | 398682 | 38,509 | 0,353 | 53,675 | 5,184 |
|  | 10311 | 464284 | 45,028 | 0,397 | 60,496 | 5,867 |
|  | 9791 | 382565 | 39,073 | 0,350 | 53,642 | 5,479 |
|  | 10353 | 449259 | 43,394 | 0,377 | 57,435 | 5,548 |
|  | 10124 | 448250 | 44,276 | 0,361 | 55,293 | 5,462 |
|  | 10344 | 425194 | 41,105 | 0,355 | 54,079 | 5,228 |
|  | 10718 | 452320 | 42,202 | 0,348 | 49,193 | 4,590 |

1. Table shows the raw data results of methods used on cells after short-term (24h) and long-term (7 days) exposition by F9 (ABS) filament.

## F10 (FLEX; A98* Trafic White; Fillamentum)

| **Short-term exposition (24h)** | | | | | | |
| --- | --- | --- | --- | --- | --- | --- |
|  | CC | FLO | SCF | ABS | %RED | SCPB |
| Units | bb | FU | FU | AU | % | 10-3 |
| **MEAN** | **4877** | **162045** | **33,177** | **0,161** | **23,084** | **4,742** |
| **SD** | **487** | **21533** | **2,438** | **0,016** | **2,336** | **0,302** |
|  | 3804 | 117427 | 30,869 | 0,131 | 18,574 | 4,883 |
|  | 5139 | 197645 | 38,460 | 0,153 | 26,304 | 5,119 |
|  | 5136 | 174692 | 34,013 | 0,167 | 24,620 | 4,794 |
|  | 4536 | 168687 | 37,188 | 0,173 | 24,377 | 5,374 |
|  | 5183 | 183086 | 35,324 | 0,177 | 25,229 | 4,868 |
|  | 5270 | 178651 | 33,900 | 0,167 | 23,809 | 4,518 |
|  | 5117 | 164662 | 32,179 | 0,153 | 22,044 | 4,308 |
|  | 5093 | 152812 | 30,004 | 0,151 | 21,618 | 4,245 |
|  | 3880 | 116867 | 30,120 | 0,126 | 17,864 | 4,604 |
|  | 5230 | 160938 | 30,772 | 0,175 | 24,397 | 4,665 |
|  | 4953 | 170412 | 34,406 | 0,176 | 24,661 | 4,979 |
|  | 4297 | 143902 | 33,489 | 0,155 | 21,912 | 5,099 |
|  | 5359 | 166659 | 31,099 | 0,176 | 24,914 | 4,649 |
|  | 5149 | 175521 | 34,088 | 0,170 | 24,093 | 4,679 |
|  | 5058 | 164420 | 32,507 | 0,162 | 23,099 | 4,567 |
|  | 4824 | 156342 | 32,409 | 0,152 | 21,831 | 4,525 |
| **Long-term exposition (7 days)** | | | | | | |
|  | CC | FLO | SCF | ABS | %RED | SCPB |
| Units | bb | FU | FU | AU | % | 10-3 |
| **MEAN** | **13119** | **439486** | **33,554** | **0,369** | **56,504** | **4,310** |
| **SD** | **789** | **28608** | **2,157** | **0,023** | **3,621** | **0,174** |
|  | 13121 | 438588 | 33,426 | 0,352 | 56,911 | 4,337 |
|  | 11961 | 367804 | 30,750 | 0,335 | 52,002 | 4,348 |
|  | 14110 | 476930 | 33,801 | 0,396 | 61,360 | 4,349 |
|  | 13206 | 425833 | 32,245 | 0,365 | 56,812 | 4,302 |
|  | 13124 | 438976 | 33,448 | 0,378 | 55,916 | 4,261 |
|  | 13484 | 459782 | 34,098 | 0,355 | 55,883 | 4,144 |
|  | 13890 | 406195 | 29,244 | 0,342 | 53,227 | 3,832 |
|  | 11973 | 422441 | 35,283 | 0,345 | 52,221 | 4,362 |
|  | 13121 | 439571 | 33,501 | 0,369 | 56,489 | 4,305 |
|  | 14191 | 441313 | 31,098 | 0,387 | 58,966 | 4,155 |
|  | 13787 | 471902 | 34,228 | 0,414 | 63,032 | 4,572 |
|  | 12793 | 413229 | 32,301 | 0,367 | 56,123 | 4,387 |
|  | 12996 | 455883 | 35,079 | 0,390 | 59,818 | 4,603 |
|  | 13593 | 475089 | 34,951 | 0,389 | 59,589 | 4,384 |
|  | 13176 | 460774 | 34,971 | 0,368 | 56,517 | 4,289 |
|  | 11379 | 437459 | 38,444 | 0,343 | 49,193 | 4,323 |

1. Table shows the raw data results of methods used on cells after short-term (24h) and long-term (7 days) exposition by F10 (FLEX/Thermoplastic Polyurethane) filament.

## F11 (PC-ABS; Natural; Fillamentum)

| **Short-term exposition (24h)** | | | | | | |
| --- | --- | --- | --- | --- | --- | --- |
|  | CC | FLO | SCF | ABS | %RED | SCPB |
| Units | bb | FU | FU | AU | % | 10-3 |
| **MEAN** | **4839** | **191738** | **39,747** | **0,193** | **27,075** | **5,629** |
| **SD** | **577** | **21851** | **3,014** | **0,020** | **2,637** | **0,460** |
|  | 3773 | 146903 | 38,935 | 0,159 | 22,155 | 5,872 |
|  | 5042 | 214073 | 42,458 | 0,210 | 29,368 | 5,825 |
|  | 5146 | 198376 | 38,550 | 0,205 | 28,759 | 5,589 |
|  | 4032 | 194189 | 48,162 | 0,172 | 24,417 | 6,056 |
|  | 5347 | 217712 | 40,717 | 0,199 | 28,140 | 5,263 |
|  | 5415 | 207468 | 38,314 | 0,208 | 29,195 | 5,392 |
|  | 5045 | 211100 | 41,843 | 0,177 | 25,077 | 4,971 |
|  | 4973 | 187478 | 37,699 | 0,172 | 24,417 | 4,910 |
|  | 3554 | 138574 | 38,991 | 0,166 | 23,038 | 6,482 |
|  | 5203 | 185092 | 35,574 | 0,219 | 30,017 | 5,769 |
|  | 5219 | 199914 | 38,305 | 0,222 | 30,707 | 5,884 |
|  | 4385 | 190008 | 43,331 | 0,199 | 27,938 | 6,371 |
|  | 5145 | 199439 | 38,764 | 0,207 | 28,932 | 5,623 |
|  | 5218 | 205502 | 39,383 | 0,206 | 28,871 | 5,533 |
|  | 5059 | 190031 | 37,563 | 0,180 | 25,462 | 5,033 |
|  | 4870 | 181956 | 37,363 | 0,188 | 26,710 | 5,485 |
| **Long-term exposition (7 days)** | | | | | | |
|  | CC | FLO | SCF | ABS | %RED | SCPB |
| Units | bb | FU | FU | AU | % | 10-3 |
| **MEAN** | **9967** | **431444** | **43,313** | **0,372** | **55,916** | **5,613** |
| **SD** | **331** | **24162** | **2,445** | **0,016** | **2,966** | **0,302** |
|  | 9928 | 436034 | 43,920 | 0,394 | 58,441 | 5,886 |
|  | 9551 | 420261 | 44,002 | 0,368 | 55,697 | 5,832 |
|  | 9751 | 418101 | 42,878 | 0,395 | 59,764 | 6,129 |
|  | 9461 | 427048 | 45,138 | 0,349 | 53,412 | 5,646 |
|  | 10166 | 464408 | 45,682 | 0,383 | 58,102 | 5,715 |
|  | 10666 | 467726 | 43,852 | 0,374 | 56,965 | 5,341 |
|  | 10385 | 446940 | 43,037 | 0,369 | 56,036 | 5,396 |
|  | 9709 | 440081 | 45,327 | 0,341 | 48,734 | 5,019 |
|  | 10479 | 390900 | 37,303 | 0,378 | 55,916 | 5,336 |
|  | 9752 | 384802 | 39,459 | 0,378 | 57,009 | 5,846 |
|  | 9936 | 451664 | 45,457 | 0,392 | 59,512 | 5,990 |
|  | 9823 | 406521 | 41,385 | 0,363 | 55,260 | 5,626 |
|  | 10040 | 428860 | 42,715 | 0,382 | 58,255 | 5,802 |
|  | 10047 | 432927 | 43,090 | 0,361 | 55,183 | 5,493 |
|  | 10026 | 426820 | 42,571 | 0,367 | 55,577 | 5,543 |
|  | 9748 | 460012 | 47,190 | 0,359 | 50,789 | 5,210 |

1. Table shows the raw data results of methods used on cells after short-term (24h) and long-term (7 days) exposition by F11 (PC-ABS) filament.

## P1 (PLA; Jet Black; Prusament)

| **Short-term exposition (24h)** | | | | | | |
| --- | --- | --- | --- | --- | --- | --- |
|  | CC | FLO | SCF | ABS | %RED | SCPB |
| Units | bb | FU | FU | AU | % | 10-3 |
| **MEAN** | **4951** | **190883** | **38,411** | **0,191** | **26,807** | **5,425** |
| **SD** | **537** | **29529** | **2,870** | **0,020** | **2,754** | **0,243** |
|  | 3502 | 121944 | 34,821 | 0,144 | 20,279 | 5,791 |
|  | 5086 | 178315 | 35,060 | 0,197 | 27,258 | 5,359 |
|  | 5098 | 195697 | 38,387 | 0,198 | 27,572 | 5,408 |
|  | 4148 | 157129 | 37,881 | 0,173 | 24,174 | 5,828 |
|  | 5272 | 186351 | 35,347 | 0,201 | 28,059 | 5,322 |
|  | 5212 | 209182 | 40,135 | 0,202 | 28,323 | 5,434 |
|  | 4981 | 190731 | 38,292 | 0,187 | 26,446 | 5,309 |
|  | 4699 | 176973 | 37,662 | 0,176 | 24,965 | 5,313 |
|  | 4280 | 147691 | 34,507 | 0,167 | 23,454 | 5,480 |
|  | 5394 | 199489 | 36,984 | 0,211 | 29,074 | 5,390 |
|  | 5426 | 214159 | 39,469 | 0,218 | 30,616 | 5,642 |
|  | 5428 | 221242 | 40,759 | 0,224 | 31,184 | 5,745 |
|  | 5183 | 230066 | 44,389 | 0,199 | 28,140 | 5,429 |
|  | 5240 | 226319 | 43,191 | 0,195 | 27,846 | 5,314 |
|  | 5160 | 207099 | 40,135 | 0,177 | 25,077 | 4,860 |
|  | 5105 | 191738 | 37,559 | 0,187 | 26,446 | 5,180 |
| **Long-term exposition (7 days)** | | | | | | |
|  | CC | FLO | SCF | ABS | %RED | SCPB |
| Units | bb | FU | FU | AU | % | 10-3 |
| **MEAN** | **10483** | **428201** | **40,868** | **0,374** | **56,412** | **5,388** |
| **SD** | **421** | **26269** | **2,304** | **0,022** | **3,452** | **0,359** |
|  | 10798 | 405654 | 37,568 | 0,406 | 60,649 | 5,617 |
|  | 10151 | 379106 | 37,347 | 0,372 | 56,233 | 5,540 |
|  | 10918 | 417686 | 38,257 | 0,397 | 59,950 | 5,491 |
|  | 9729 | 437407 | 44,959 | 0,366 | 55,839 | 5,739 |
|  | 10740 | 439912 | 40,960 | 0,378 | 57,337 | 5,339 |
|  | 10381 | 439155 | 42,304 | 0,405 | 61,240 | 5,899 |
|  | 10694 | 439801 | 41,126 | 0,354 | 53,686 | 5,020 |
|  | 11169 | 430945 | 38,584 | 0,342 | 49,400 | 4,423 |
|  | 10150 | 400826 | 39,490 | 0,385 | 57,632 | 5,678 |
|  | 10185 | 400903 | 39,362 | 0,349 | 53,248 | 5,228 |
|  | 10195 | 438327 | 42,994 | 0,388 | 58,758 | 5,763 |
|  | 9858 | 410006 | 41,591 | 0,342 | 52,297 | 5,305 |
|  | 11007 | 485850 | 44,140 | 0,404 | 61,010 | 5,543 |
|  | 10873 | 465907 | 42,850 | 0,375 | 57,195 | 5,260 |
|  | 10432 | 420951 | 40,352 | 0,350 | 53,587 | 5,137 |
|  | 10447 | 438774 | 42,000 | 0,367 | 54,538 | 5,220 |

1. Table shows the raw data results of methods used on cells after short-term (24h) and long-term (7 days) exposition by P1 (PLA) filament.

## Untreated cells CTRL4 (for P2, P3, S1, and V1)

| **Short-term exposition (24h)** | | | | | | |
| --- | --- | --- | --- | --- | --- | --- |
|  | CC | FLO | SCF | ABS | %RED | SCPB |
| Units | bb | FU | FU | AU | % | 10-3 |
| **MEAN** | **5060** | **210961** | **41,552** | **0,168** | **25,860** | **5,117** |
| **SD** | **400** | **28584** | **3,350** | **0,019** | **2,651** | **0,405** |
|  | 4478 | 169940 | 37,950 | 0,150 | 23,222 | 5,186 |
|  | 5358 | 226139 | 42,206 | 0,147 | 23,138 | 4,318 |
|  | 5416 | 231566 | 42,756 | 0,168 | 25,846 | 4,772 |
|  | 5110 | 211859 | 41,460 | 0,170 | 26,396 | 5,166 |
|  | 5320 | 236337 | 44,424 | 0,173 | 26,216 | 4,928 |
|  | 5401 | 244828 | 45,330 | 0,189 | 28,819 | 5,336 |
|  | 5124 | 233539 | 45,577 | 0,188 | 28,332 | 5,529 |
|  | 5165 | 207668 | 40,207 | 0,167 | 25,518 | 4,941 |
|  | 4110 | 137914 | 33,556 | 0,129 | 20,461 | 4,978 |
|  | 5326 | 220176 | 41,340 | 0,170 | 26,185 | 4,916 |
|  | 5274 | 188630 | 35,766 | 0,152 | 23,561 | 4,467 |
|  | 4643 | 197619 | 42,563 | 0,149 | 23,318 | 5,022 |
|  | 5465 | 232326 | 42,512 | 0,193 | 29,390 | 5,378 |
|  | 5103 | 227401 | 44,562 | 0,190 | 28,988 | 5,681 |
|  | 5125 | 223476 | 43,605 | 0,194 | 29,295 | 5,716 |
|  | 4534 | 185961 | 41,015 | 0,165 | 25,074 | 5,530 |
| **Long-term exposition (7 days)** | | | | | | |
|  | CC | FLO | SCF | ABS | %RED | SCPB |
| Units | bb | FU | FU | AU | % | 10-3 |
| **MEAN** | **10333** | **455095** | **44,078** | **0,361** | **59,754** | **5,786** |
| **SD** | **276** | **40176** | **4,110** | **0,017** | **3,274** | **0,335** |
|  | 10302 | 415650 | 40,347 | 0,368 | 60,949 | 5,916 |
|  | 10521 | 405463 | 38,538 | 0,339 | 57,387 | 5,454 |
|  | 10546 | 409043 | 38,787 | 0,388 | 65,833 | 6,242 |
|  | 10545 | 393059 | 37,274 | 0,339 | 56,434 | 5,352 |
|  | 10555 | 472932 | 44,806 | 0,379 | 61,139 | 5,792 |
|  | 10083 | 488362 | 48,434 | 0,368 | 61,664 | 6,116 |
|  | 10358 | 474782 | 45,837 | 0,360 | 56,505 | 5,455 |
|  | 9755 | 456304 | 46,776 | 0,343 | 58,685 | 6,016 |
|  | 10302 | 406131 | 39,423 | 0,350 | 57,637 | 5,595 |
|  | 10521 | 441314 | 41,946 | 0,349 | 58,935 | 5,602 |
|  | 10546 | 486770 | 46,157 | 0,392 | 66,417 | 6,298 |
|  | 10545 | 481060 | 45,620 | 0,350 | 57,220 | 5,426 |
|  | 10555 | 505233 | 47,867 | 0,380 | 61,926 | 5,867 |
|  | 10083 | 492531 | 48,848 | 0,367 | 61,354 | 6,085 |
|  | 10358 | 517174 | 49,930 | 0,348 | 54,754 | 5,286 |
|  | 9755 | 435713 | 44,666 | 0,348 | 59,221 | 6,071 |

1. Table shows the raw data results of methods used on untreated (CTRL) after 24h and 7th day

## P2 (PETG; PETG Jet Black; Prusament)

| **Short-term exposition (24h)** | | | | | | |
| --- | --- | --- | --- | --- | --- | --- |
|  | CC | FLO | SCF | ABS | %RED | SCPB |
| Units | bb | FU | FU | AU | % | 10-3 |
| **MEAN** | **4078** | **132161** | **32,408** | **0,166** | **24,979** | **6,125** |
| **SD** | **5269** | **188677** | **35,809** | **0,197** | **29,115** | **5,526** |
|  | 5173 | 209448 | 40,489 | 0,204 | 30,300 | 5,857 |
|  | 4377 | 178212 | 40,716 | 0,169 | 25,592 | 5,847 |
|  | 5082 | 191256 | 37,634 | 0,201 | 30,004 | 5,904 |
|  | 5164 | 229804 | 44,501 | 0,201 | 30,639 | 5,933 |
|  | 5001 | 204405 | 40,873 | 0,190 | 28,671 | 5,733 |
|  | 4609 | 193661 | 42,018 | 0,169 | 25,804 | 5,599 |
|  | 4255 | 145026 | 34,084 | 0,172 | 25,783 | 6,059 |
|  | 4966 | 193971 | 39,060 | 0,186 | 27,835 | 5,605 |
|  | 5223 | 202355 | 38,743 | 0,201 | 29,898 | 5,724 |
|  | 4838 | 174850 | 36,141 | 0,186 | 28,205 | 5,830 |
|  | 5258 | 199835 | 38,006 | 0,193 | 29,020 | 5,519 |
|  | 5322 | 229601 | 43,142 | 0,203 | 30,395 | 5,711 |
|  | 5273 | 210386 | 39,899 | 0,182 | 27,422 | 5,201 |
|  | 4955 | 192473 | 38,844 | 0,176 | 27,987 | 5,648 |
|  | 4078 | 132161 | 32,408 | 0,166 | 24,979 | 6,125 |
|  | 5269 | 188677 | 35,809 | 0,197 | 29,115 | 5,526 |
| **Long-term exposition (7 days)** | | | | | | |
|  | CC | FLO | SCF | ABS | %RED | SCPB |
| Units | bb | FU | FU | AU | % | 10-3 |
| **MEAN** | **13549** | **430463** | **31,980** | **0,338** | **55,962** | **4,150** |
| **SD** | **1073** | **49945** | **4,512** | **0,032** | **6,123** | **0,533** |
|  | 14886 | 359873 | 24,175 | 0,344 | 59,114 | 3,971 |
|  | 12808 | 390009 | 30,450 | 0,303 | 51,895 | 4,052 |
|  | 14825 | 392824 | 26,497 | 0,315 | 54,539 | 3,679 |
|  | 14709 | 381971 | 25,969 | 0,326 | 55,504 | 3,773 |
|  | 12974 | 414983 | 31,986 | 0,313 | 51,895 | 4,000 |
|  | 12951 | 419158 | 32,365 | 0,296 | 48,475 | 3,743 |
|  | 13290 | 392255 | 29,515 | 0,286 | 44,127 | 3,320 |
|  | 11947 | 429152 | 35,921 | 0,357 | 60,818 | 5,091 |
|  | 14886 | 392493 | 26,367 | 0,339 | 55,719 | 3,743 |
|  | 12808 | 424541 | 33,147 | 0,335 | 55,671 | 4,347 |
|  | 14825 | 500577 | 33,766 | 0,403 | 68,216 | 4,601 |
|  | 14709 | 522005 | 35,489 | 0,373 | 60,830 | 4,136 |
|  | 12974 | 512934 | 39,536 | 0,367 | 58,256 | 4,490 |
|  | 12951 | 489926 | 37,829 | 0,363 | 61,008 | 4,711 |
|  | 13290 | 438848 | 33,021 | 0,324 | 47,975 | 3,610 |
|  | 11947 | 425861 | 35,646 | 0,361 | 61,342 | 5,135 |

1. Table shows the raw data results of methods used on cells after short-term (24h) and long-term (7 days) exposition by P2 (PETG) filament.

## P3 (PC; Blend; Prusament)

| **Short-term exposition (24h)** | | | | | | |
| --- | --- | --- | --- | --- | --- | --- |
|  | CC | FLO | SCF | ABS | %RED | SCPB |
| Units | bb | FU | FU | AU | % | 10-3 |
| **MEAN** | **5030** | **220733** | **43,865** | **0,213** | **31,836** | **6,349** |
| **SD** | **363** | **30061** | **4,944** | **0,013** | **1,931** | **0,443** |
|  | 4296 | 181091 | 42,153 | 0,203 | 30,025 | 6,989 |
|  | 5323 | 237288 | 44,578 | 0,229 | 33,897 | 6,368 |
|  | 5419 | 176299 | 32,533 | 0,213 | 31,400 | 5,795 |
|  | 4867 | 248597 | 51,078 | 0,235 | 34,807 | 7,152 |
|  | 5324 | 233826 | 43,919 | 0,231 | 34,236 | 6,430 |
|  | 5198 | 225358 | 43,355 | 0,226 | 33,548 | 6,454 |
|  | 5165 | 246689 | 47,762 | 0,201 | 30,216 | 5,850 |
|  | 4964 | 202211 | 40,735 | 0,192 | 28,904 | 5,823 |
|  | 4087 | 164238 | 40,185 | 0,198 | 29,179 | 7,139 |
|  | 5190 | 198619 | 38,270 | 0,212 | 31,337 | 6,038 |
|  | 5134 | 266594 | 51,927 | 0,228 | 34,045 | 6,631 |
|  | 4900 | 196381 | 40,078 | 0,201 | 30,268 | 6,177 |
|  | 5308 | 232454 | 43,793 | 0,216 | 33,019 | 6,221 |
|  | 5114 | 244388 | 47,788 | 0,218 | 32,617 | 6,378 |
|  | 5128 | 241918 | 47,176 | 0,212 | 31,707 | 6,183 |
|  | 5070 | 235780 | 46,505 | 0,201 | 30,163 | 5,949 |
| **Long-term exposition (7 days)** | | | | | | |
|  | CC | FLO | SCF | ABS | %RED | SCPB |
| Units | bb | FU | FU | AU | % | 10-3 |
| **MEAN** | **11709** | **469725** | **40,104** | **0,358** | **58,810** | **5,019** |
| **SD** | **379** | **44378** | **3,385** | **0,024** | **5,254** | **0,371** |
|  | 11718 | 407671 | 34,790 | 0,344 | 56,493 | 4,821 |
|  | 11295 | 465822 | 41,241 | 0,363 | 61,127 | 5,412 |
|  | 12389 | 491164 | 39,645 | 0,359 | 58,459 | 4,719 |
|  | 11894 | 515594 | 43,349 | 0,391 | 64,082 | 5,388 |
|  | 12022 | 527556 | 43,883 | 0,361 | 57,887 | 4,815 |
|  | 11516 | 440906 | 38,286 | 0,325 | 55,195 | 4,793 |
|  | 11189 | 480951 | 42,984 | 0,336 | 49,965 | 4,466 |
|  | 11645 | 445656 | 38,270 | 0,364 | 62,152 | 5,337 |
|  | 11718 | 388925 | 33,190 | 0,368 | 60,174 | 5,135 |
|  | 11295 | 410328 | 36,328 | 0,336 | 56,696 | 5,020 |
|  | 12389 | 502458 | 40,557 | 0,421 | 71,349 | 5,759 |
|  | 11894 | 532885 | 44,803 | 0,375 | 61,330 | 5,156 |
|  | 12022 | 504235 | 41,943 | 0,355 | 56,326 | 4,685 |
|  | 11516 | 502752 | 43,657 | 0,353 | 59,817 | 5,194 |
|  | 11189 | 448421 | 40,077 | 0,325 | 49,238 | 4,401 |
|  | 11645 | 450281 | 38,667 | 0,359 | 60,663 | 5,209 |

1. Table shows the raw data results of methods used on cells after short-term (24h) and long-term (7 days) exposition by P3 (Polycarbonate) filament.

## S1 (ABS; MEDICAL; Smartfill)

| **Short-term exposition (24h)** | | | | | | |
| --- | --- | --- | --- | --- | --- | --- |
|  | CC | FLO | SCF | ABS | %RED | SCPB |
| Units | bb | FU | FU | AU | % | 10-3 |
| **MEAN** | **4984** | **207422** | **41,640** | **0,201** | **30,259** | **6,082** |
| **SD** | **345** | **23715** | **4,062** | **0,014** | **1,838** | **0,306** |
|  | 4269 | 160945 | 37,701 | 0,181 | 26,936 | 6,310 |
|  | 5303 | 207603 | 39,148 | 0,208 | 31,030 | 5,851 |
|  | 5300 | 226037 | 42,648 | 0,217 | 31,972 | 6,032 |
|  | 4958 | 181590 | 36,626 | 0,195 | 29,147 | 5,879 |
|  | 5224 | 219771 | 42,069 | 0,215 | 32,003 | 6,126 |
|  | 4979 | 204758 | 41,124 | 0,186 | 29,898 | 6,005 |
|  | 4845 | 229405 | 47,349 | 0,199 | 30,829 | 6,363 |
|  | 4938 | 214675 | 43,474 | 0,194 | 29,983 | 6,072 |
|  | 4172 | 173126 | 41,497 | 0,188 | 28,015 | 6,715 |
|  | 5146 | 229362 | 44,571 | 0,209 | 31,094 | 6,042 |
|  | 5462 | 179256 | 32,819 | 0,208 | 30,924 | 5,662 |
|  | 4980 | 246666 | 49,531 | 0,212 | 31,813 | 6,388 |
|  | 5129 | 209544 | 40,855 | 0,219 | 32,575 | 6,351 |
|  | 5143 | 209981 | 40,829 | 0,213 | 31,718 | 6,167 |
|  | 5065 | 228854 | 45,183 | 0,199 | 29,824 | 5,888 |
|  | 4830 | 197171 | 40,822 | 0,174 | 26,386 | 5,463 |
| **Long-term exposition (7 days)** | | | | | | |
|  | CC | FLO | SCF | ABS | %RED | SCPB |
| Units | bb | FU | FU | AU | % | 10-3 |
| **MEAN** | **11051** | **411839** | **37,848** | **0,358** | **58,511** | **5,318** |
| **SD** | **1328** | **35347** | **6,089** | **0,034** | **6,693** | **0,526** |
|  | 12231 | 355755 | 29,086 | 0,389 | 62,271 | 5,091 |
|  | 12300 | 370095 | 30,089 | 0,358 | 59,221 | 4,815 |
|  | 13248 | 441772 | 33,346 | 0,394 | 66,739 | 5,038 |
|  | 10908 | 440519 | 40,385 | 0,382 | 60,401 | 5,537 |
|  | 10139 | 446256 | 44,014 | 0,366 | 58,006 | 5,721 |
|  | 9616 | 443561 | 46,127 | 0,372 | 62,903 | 6,541 |
|  | 9622 | 464321 | 48,256 | 0,319 | 48,213 | 5,011 |
|  | 10345 | 413532 | 39,974 | 0,341 | 58,661 | 5,671 |
|  | 12231 | 354796 | 29,008 | 0,382 | 62,128 | 5,080 |
|  | 12300 | 399303 | 32,464 | 0,376 | 62,771 | 5,103 |
|  | 13248 | 452130 | 34,128 | 0,407 | 68,502 | 5,171 |
|  | 10908 | 419051 | 38,417 | 0,356 | 56,457 | 5,176 |
|  | 10139 | 405830 | 40,027 | 0,356 | 56,636 | 5,586 |
|  | 9616 | 412396 | 42,886 | 0,340 | 58,232 | 6,056 |
|  | 9622 | 402791 | 41,861 | 0,275 | 41,196 | 4,281 |
|  | 10345 | 367316 | 35,507 | 0,311 | 53,836 | 5,204 |

1. Table shows the raw data results of methods used on cells after short-term (24h) and long-term (7 days) exposition by S1 (ABS) filament.

## V1 (PP; PP transparent; Verbatim)

| **Short-term exposition (24h)** | | | | | | |
| --- | --- | --- | --- | --- | --- | --- |
|  | CC | FLO | SCF | ABS | %RED | SCPB |
| Units | bb | FU | FU | AU | % | 10-3 |
| **MEAN** | **5123** | **214683** | **41,885** | **0,202** | **30,151** | **5,909** |
| **SD** | **460** | **29208** | **4,392** | **0,018** | **2,510** | **0,470** |
|  | 3719 | 138105 | 37,135 | 0,161 | 24,079 | 6,475 |
|  | 5334 | 180371 | 33,815 | 0,206 | 30,427 | 5,704 |
|  | 5153 | 247650 | 48,059 | 0,230 | 34,119 | 6,621 |
|  | 5141 | 221328 | 43,052 | 0,216 | 32,120 | 6,248 |
|  | 5139 | 225100 | 43,802 | 0,212 | 31,654 | 6,160 |
|  | 5084 | 244365 | 48,065 | 0,217 | 32,501 | 6,393 |
|  | 5242 | 230699 | 44,010 | 0,191 | 28,787 | 5,492 |
|  | 4784 | 215515 | 45,049 | 0,184 | 27,761 | 5,803 |
|  | 4582 | 173170 | 37,794 | 0,195 | 28,830 | 6,292 |
|  | 5645 | 203457 | 36,042 | 0,185 | 27,772 | 4,920 |
|  | 5256 | 214556 | 40,821 | 0,217 | 32,289 | 6,143 |
|  | 5402 | 236134 | 43,712 | 0,224 | 33,104 | 6,128 |
|  | 5551 | 218892 | 39,433 | 0,204 | 30,300 | 5,459 |
|  | 5366 | 218423 | 40,705 | 0,203 | 30,290 | 5,645 |
|  | 5102 | 246261 | 48,268 | 0,194 | 29,136 | 5,711 |
|  | 5469 | 220906 | 40,392 | 0,195 | 29,253 | 5,349 |
| **Long-term exposition (7 days)** | | | | | | |
|  | CC | FLO | SCF | ABS | %RED | SCPB |
| Units | bb | FU | FU | AU | % | 10-3 |
| **MEAN** | **12878** | **439066** | **34,121** | **0,370** | **61,227** | **4,770** |
| **SD** | **846** | **40840** | **2,723** | **0,029** | **5,752** | **0,520** |
|  | 11787 | 370292 | 31,415 | 0,398 | 66,071 | 5,605 |
|  | 11810 | 395065 | 33,452 | 0,367 | 61,592 | 5,215 |
|  | 13266 | 457870 | 34,515 | 0,418 | 70,241 | 5,295 |
|  | 14307 | 453599 | 31,705 | 0,387 | 62,069 | 4,338 |
|  | 13289 | 461511 | 34,729 | 0,401 | 64,737 | 4,871 |
|  | 12903 | 463672 | 35,935 | 0,365 | 62,223 | 4,822 |
|  | 12248 | 475298 | 38,806 | 0,316 | 49,309 | 4,026 |
|  | 13410 | 391949 | 29,228 | 0,325 | 55,790 | 4,160 |
|  | 11787 | 361494 | 30,669 | 0,381 | 63,784 | 5,411 |
|  | 11810 | 404961 | 34,290 | 0,368 | 61,961 | 5,247 |
|  | 13266 | 439876 | 33,158 | 0,396 | 66,703 | 5,028 |
|  | 14307 | 477286 | 33,360 | 0,372 | 60,103 | 4,201 |
|  | 13289 | 489147 | 36,808 | 0,377 | 61,235 | 4,608 |
|  | 12903 | 461731 | 35,785 | 0,375 | 63,593 | 4,929 |
|  | 12248 | 477231 | 38,964 | 0,319 | 48,511 | 3,961 |
|  | 13410 | 444073 | 33,115 | 0,362 | 61,711 | 4,602 |

1. Table shows the raw data results of methods used on cells after short-term (24h) and long-term (7 days) exposition by V1 (Polyprophylene) filament.

# RAW DATA - HR Respirometry and Citrate synthase

Following tables provide the complete raw data collected from the High-Resolution Respirometry (HRR) analysis performed on Human Dermal Fibroblasts (HDFs) following long-term (7 days) indirect exposure filament materials. The respiratory flux values are initially expressed in pmol O₂/s/per million cells and subsequently normalized to the activity of the Citrate Synthase (CS) enzyme activity (expressed in mU) to account for variations in mitochondrial content. The columns list contain the key mitochondrial respiration states: ROUT (Routine Respiration, representing basal oxygen consumption), LEAK (Leak Respiration or Proton Leak, indicating O₂ consumption decoupled from ATP synthesis), ETS (Electron Transport System, showing maximum respiratory capacity), and CIV (Complex IV, the flux capacity of Cytochrome c Oxidase). Additionally, the table includes calculated functional parameters: R-L (ROUTINE minus LEAK), which quantifies the net respiratory capacity specifically coupled to ATP production (Phosphorylation Flux), and E-R (ETS minus ROUTINE), which represents the valuable Respiratory Reserve Capacity of the cells.

| **F4 (HRR)** | | | | | |  | **F4 (CS)** | | | | | |
| --- | --- | --- | --- | --- | --- | --- | --- | --- | --- | --- | --- | --- |
| **ROUT** | **LEAK** | **ETS** | **CIV** | **R-L** | **E-R** |  | **ROUT** | **LEAK** | **ETS** | **CIV** | **R-L** | **E-R** |
| 37,865 | 6,575 | 121,531 | 148,185 |  | 83,666 |  | 2698 |  | 9740 | 12319 |  | 7042 |
| 39,421 | 6,195 | 106,845 | 113,000 | 33,225 | 67,424 |  | 3209 | 557 | 10298 | 12557 | 2651 | 7090 |
| 39,905 | 6,146 | 128,333 | 172,650 | 33,759 | 88,428 |  | 3669 | 577 | 9946 | 10519 | 3093 | 6276 |
| 34,923 | 5,893 | 110,167 | 146,232 | 29,030 | 75,244 |  | 3169 | 488 | 10193 | 13713 | 2681 | 7023 |
| 35,141 | 6,146 | 115,749 | 139,655 | 28,995 | 80,608 |  | 3929 | 663 | 12395 | 16452 | 3266 | 8466 |
| 36,401 | 6,629 | 119,806 | 142,114 | 29,771 | 83,406 |  | 3644 | 637 | 12004 | 14483 | 3007 | 8360 |
| 46,273 | 10,691 | 141,726 | 183,818 | 35,582 | 95,453 |  | 4368 | 796 | 14377 | 17054 | 3573 | 10009 |
| 18,337 | 13,823 | 130,681 | 161,294 | 4,514 | 112,344 |  | 4325 | 999 | 13245 | 17179 | 3325 | 8921 |
| **CTRL4 (HRR)** | | | | | |  | **CTRL4 (CS)** | | | | | |
| **ROUT** | **LEAK** | **ETS** | **CIV** | **R-L** | **E-R** |  | **ROUT** | **LEAK** | **ETS** | **CIV** | **R-L** | **E-R** |
| 55,915 | 9,773 | 178,020 | 213,729 | 46,142 | 122,105 |  | 2910 | 509 | 9263 | 11121 | 2401 | 6354 |
| 50,411 | 9,974 | 155,481 | 191,428 | 40,437 | 105,070 |  | 3108 | 615 | 9586 | 11802 | 2493 | 6478 |
| 47,638 | 9,220 | 132,901 | 152,355 | 38,419 | 85,263 |  | 3410 | 660 | 9513 | 10905 | 2750 | 6103 |
| 46,407 | 9,203 | 148,693 | 209,168 | 37,204 | 102,287 |  | 3560 | 706 | 11407 | 16047 | 2854 | 7847 |
| 44,492 | 11,508 | 135,595 | 170,430 | 32,983 | 91,103 |  | 3458 | 894 | 10538 | 13245 | 2563 | 7080 |
| 37,965 | 12,386 | 108,712 | 129,582 | 25,578 | 70,747 |  | 3601 | 1175 | 10311 | 12291 | 2426 | 6710 |
| 39,955 | 8,976 | 117,789 | 134,271 | 30,978 | 77,834 |  | 3726 | 837 | 10985 | 12522 | 2889 | 7259 |
| 46,641 | 11,078 | 138,533 | 189,595 | 35,564 | 91,892 |  | 3383 | 803 | 10048 | 13752 | 2580 | 6665 |

1. Table shows results of High-Resolution Respirometry analysis data in pmol of O2/s/cells or IU as a response to long term (7 days) exposition to F4 (PLA; Extrafill Natural; Fillamentum) filament material.

| **F5 (HRR)** | | | | | |  | **F5 (CS)** | | | | | |
| --- | --- | --- | --- | --- | --- | --- | --- | --- | --- | --- | --- | --- |
| **ROUT** | **LEAK** | **ETS** | **CIV** | **R-L** | **E-R** |  | **ROUT** | **LEAK** | **ETS** | **CIV** | **R-L** | **E-R** |
| 43,880 | 8,014 | 147,895 | 184,357 | 35,866 | 104,014 |  | 3196 | 584 | 10771 | 13426 | 2612 | 7575 |
| 53,560 | 9,500 | 178,393 | 223,424 | 44,060 | 124,833 |  | 3250 | 576 | 10824 | 13557 | 2673 | 7574 |
| 39,275 | 5,809 | 127,598 | 148,822 | 33,465 | 88,324 |  | 2722 | 403 | 8845 | 10316 | 2320 | 6122 |
| 44,693 | 7,891 | 151,029 | 213,073 | 36,802 | 106,336 |  | 3068 | 542 | 10369 | 14629 | 2527 | 7301 |
| 34,711 | 6,635 | 106,160 | 131,890 | 28,076 | 71,449 |  | 2612 | 499 | 7989 | 9925 | 2113 | 5377 |
| 32,336 | 3,543 | 127,745 | 165,197 | 28,793 | 95,409 |  | 2391 | 262 | 9447 | 12216 | 2129 | 7055 |
| 31,652 | 6,617 | 107,823 | 120,059 | 25,035 | 76,171 |  | 3113 | 651 | 10603 | 11806 | 2462 | 7491 |
| 46,709 | 6,976 | 156,031 | 194,781 | 39,734 | 109,322 |  | 3085 | 461 | 10307 | 12867 | 2625 | 7221 |
| **CTRL3 (HRR)** | | | | | |  | **CTRL3 (CS)** | | | | | |
| **ROUT** | **LEAK** | **ETS** | **CIV** | **R-L** | **E-R** |  | **ROUT** | **LEAK** | **ETS** | **CIV** | **R-L** | **E-R** |
| 42,870 | 5,613 | 129,057 | 120,164 | 37,257 | 86,188 |  | 2662 | 348 | 8013 | 7461 | 2313 | 5351 |
| 45,278 | 7,370 | 135,149 | 180,945 | 37,908 | 89,871 |  | 3455 | 562 | 10313 | 13808 | 2893 | 6858 |
| 41,355 | 8,247 | 112,209 | 143,329 | 33,108 | 70,854 |  | 3073 | 613 | 8337 | 10650 | 2460 | 5265 |
| 49,189 | 7,566 | 144,395 | 189,327 | 41,623 | 95,205 |  | 3016 | 464 | 8855 | 11610 | 2552 | 5838 |
| 41,212 | 8,984 | 117,493 | 152,834 | 32,228 | 76,281 |  | 2843 | 620 | 8106 | 10545 | 2224 | 5263 |
| 42,311 | 9,783 | 127,072 | 139,233 | 32,528 | 84,760 |  | 3328 | 770 | 9995 | 10952 | 2559 | 6667 |
| 47,039 | 9,657 | 137,026 | 158,337 | 37,382 | 89,987 |  | 2864 | 588 | 8342 | 9639 | 2276 | 5478 |
| 46,534 | 8,190 | 132,233 | 144,743 | 38,344 | 85,700 |  | 3489 | 614 | 9915 | 10853 | 2875 | 6426 |

1. Table shows results of High-Resolution Respirometry analysis data in pmol ofO2/s/ cells or IU as a response to long term (7 days) exposition to F5 (CPE; HG100 Extrafill Natural; Fillamentum) filament material.

| **F8 (HRR)** | | | | | |  | **F8 (CS)** | | | | | |
| --- | --- | --- | --- | --- | --- | --- | --- | --- | --- | --- | --- | --- |
| **ROUT** | **LEAK** | **ETS** | **CIV** | **R-L** | **E-R** |  | **ROUT** | **LEAK** | **ETS** | **CIV** | **R-L** | **E-R** |
| 36,216 | 15,248 | 112,592 | 160,512 | 20,968 | 76,377 |  | 2712 | 1142 | 8432 | 12021 | 1570 | 5720 |
| 31,945 | 12,400 | 101,450 | 153,919 | 19,545 | 69,505 |  | 2510 | 974 | 7972 | 12095 | 1536 | 5462 |
| 32,170 | 11,150 | 102,815 | 142,185 | 21,020 | 70,645 |  | 2468 | 855 | 7886 | 10906 | 1612 | 5419 |
| 40,409 | 16,518 | 121,230 | 208,443 | 23,891 | 80,822 |  | 2652 | 1084 | 7955 | 13678 | 1568 | 5304 |
| 40,220 | 15,617 | 131,071 | 195,381 | 24,602 | 90,851 |  | 2363 | 918 | 7701 | 11479 | 1445 | 5338 |
| 32,256 | 7,308 | 108,049 | 154,056 | 24,948 | 75,793 |  | 2321 | 526 | 7776 | 11086 | 1795 | 5454 |
| 43,157 | 15,159 | 135,457 | 184,312 | 27,998 | 92,300 |  | 2935 | 1031 | 9211 | 12533 | 1904 | 6276 |
| 36,335 | 14,051 | 111,596 | 168,612 | 22,284 | 75,260 |  | 2721 | 1052 | 8357 | 12627 | 1669 | 5636 |
| **CTRL1 (HRR)** | | | | | |  | **CTRL1 (CS)** | | | | | |
| **ROUT** | **LEAK** | **ETS** | **CIV** | **R-L** | **E-R** |  | **ROUT** | **LEAK** | **ETS** | **CIV** | **R-L** | **E-R** |
| 38,853 | 11,254 | 114,545 | 144,108 | 27,599 | 75,693 |  | 2600 | 753 | 7666 | 9645 | 1847 | 5066 |
| 34,910 | 10,813 | 113,530 | 132,546 | 24,097 | 78,619 |  | 2187 | 677 | 7111 | 8302 | 1509 | 4925 |
| 43,143 | 15,636 | 125,601 | 146,331 | 27,506 | 82,458 |  | 2439 | 884 | 7102 | 8274 | 1555 | 4662 |
| 36,903 | 12,093 | 107,733 | 128,847 | 24,810 | 70,830 |  | 2439 | 799 | 7119 | 8514 | 1639 | 4680 |
| 43,171 | 12,833 | 127,767 | 156,399 | 30,338 | 84,596 |  | 2222 | 660 | 6575 | 8048 | 1561 | 4353 |
| 37,043 | 11,546 | 102,895 | 147,201 | 25,496 | 65,852 |  | 2841 | 886 | 7892 | 11291 | 1956 | 5051 |
| 35,115 | 10,712 | 104,386 | 126,613 | 24,403 | 69,271 |  | 2832 | 864 | 8420 | 10213 | 1968 | 5588 |
| 34,139 | 11,904 | 107,888 | 127,462 | 22,234 | 73,750 |  | 2510 | 875 | 7932 | 9371 | 1635 | 5422 |

1. Table shows results of High-Resolution Respirometry analysis data in pmol of O2/s/ cells or IUas a response to long term (7 days) exposition to F8 (ABS; Extrafill Natural; Fillamentum) filament material.

| **F10 (HRR)** | | | | | |  | **F10 (CS)** | | | | | |
| --- | --- | --- | --- | --- | --- | --- | --- | --- | --- | --- | --- | --- |
| **ROUT** | **LEAK** | **ETS** | **CIV** | **R-L** | **E-R** |  | **ROUT** | **LEAK** | **ETS** | **CIV** | **R-L** | **E-R** |
| 15,953 | 13,155 | 157,666 | 168,458 | 2,798 | 141,713 |  | 790 | 652 | 7809 | 8343 | 139 | 7019 |
| 17,451 | 12,261 | 157,272 | 176,242 | 5,189 | 139,822 |  | 919 | 645 | 8280 | 9278 | 273 | 7361 |
| 18,461 | 13,531 | 145,127 | 144,020 | 4,930 | 126,666 |  | 987 | 723 | 7759 | 7700 | 264 | 6772 |
| 22,871 | 16,522 | 198,796 | 228,092 | 6,349 | 175,925 |  | 979 | 707 | 8510 | 9764 | 272 | 7531 |
| 23,069 | 18,633 | 176,866 | 207,955 | 4,435 | 153,798 |  | 1255 | 1014 | 9622 | 11313 | 241 | 8367 |
| 20,884 | 17,181 | 173,907 | 195,255 | 3,703 | 153,023 |  | 1136 | 935 | 9461 | 10622 | 201 | 8324 |
| 14,870 | 12,076 | 127,672 | 145,788 | 2,794 | 112,801 |  | 1055 | 856 | 9054 | 10338 | 198 | 7999 |
| 18,337 | 13,823 | 130,681 | 161,294 | 4,514 | 140,323 |  | 1310 | 988 | 8651 | 11527 | 323 | 7631 |
| **CTRL4 (HRR)** | | | | | |  | **CTRL4 (CS)** | | | | | |
| **ROUT** | **LEAK** | **ETS** | **CIV** | **R-L** | **E-R** |  | **ROUT** | **LEAK** | **ETS** | **CIV** | **R-L** | **E-R** |
| 55,915 | 9,773 | 178,020 | 213,729 | 46,142 | 122,105 |  | 2910 | 509 | 9263 | 11121 | 2401 | 6354 |
| 50,411 | 9,974 | 155,481 | 191,428 | 40,437 | 105,070 |  | 3108 | 615 | 9586 | 11802 | 2493 | 6478 |
| 47,638 | 9,220 | 132,901 | 152,355 | 38,419 | 85,263 |  | 3410 | 660 | 9513 | 10905 | 2750 | 6103 |
| 46,407 | 9,203 | 148,693 | 209,168 | 37,204 | 102,287 |  | 3560 | 706 | 11407 | 16047 | 2854 | 7847 |
| 44,492 | 11,508 | 135,595 | 170,430 | 32,983 | 91,103 |  | 3458 | 894 | 10538 | 13245 | 2563 | 7080 |
| 37,965 | 12,386 | 108,712 | 129,582 | 25,578 | 70,747 |  | 3601 | 1175 | 10311 | 12291 | 2426 | 6710 |
| 39,955 | 8,976 | 117,789 | 134,271 | 30,978 | 77,834 |  | 3726 | 837 | 10985 | 12522 | 2889 | 7259 |
| 46,641 | 11,078 | 138,533 | 189,595 | 35,564 | 91,892 |  | 3383 | 803 | 10048 | 13752 | 2580 | 6665 |

1. Table shows results of High-Resolution Respirometry analysis data in pmol of O2/s/ cells or IU as a response to long term (7 days) exposition to F10 (FLEX/TPU; A98* Trafic White; Fillamentum) filament material.

| **P2 (HRR)** | | | | | |  | **P2 (CS)** | | | | | |
| --- | --- | --- | --- | --- | --- | --- | --- | --- | --- | --- | --- | --- |
| **ROUT** | **LEAK** | **ETS** | **CIV** | **R-L** | **E-R** |  | **ROUT** | **LEAK** | **ETS** | **CIV** | **R-L** | **E-R** |
| 38,887 | 7,583 | 123,571 | 150,762 | 31,304 | 84,684 |  | 3526 | 688 | 11204 | 13669 | 2838 | 7678 |
| 62,310 | 13,265 | 194,994 | 228,166 | 49,045 | 132,684 |  | 3632 | 773 | 11365 | 13299 | 2859 | 7734 |
| 39,784 | 8,662 | 123,266 | 157,809 | 31,121 | 83,482 |  | 3702 | 806 | 11470 | 14685 | 2896 | 7768 |
| 44,697 | 8,499 | 137,994 | 187,380 | 36,198 | 93,297 |  | 3583 | 681 | 11063 | 15022 | 2902 | 7479 |
| 42,715 | 9,366 | 126,380 | 157,230 | 33,349 | 83,665 |  | 3950 | 866 | 11688 | 14541 | 3084 | 7737 |
| 48,739 | 11,091 | 149,722 | 183,712 | 37,649 | 100,982 |  | 3845 | 875 | 11810 | 14491 | 2970 | 7965 |
| 46,219 | 9,271 | 141,349 | 175,968 | 35,917 | 97,651 |  | 3701 | 784 | 11419 | 14824 | 29239 | 7726 |
|  |  |  |  |  |  |  |  |  |  |  |  |  |
| **CTRL5 (HRR)** | | | | | |  | **CTRL5 (CS)** | | | | | |
| **ROUT** | **LEAK** | **ETS** | **CIV** | **R-L** | **E-R** |  | **ROUT** | **LEAK** | **ETS** | **CIV** | **R-L** | **E-R** |
| 30,997 | 6,109 | 98,811 | 142,004 | 24,888 | 67,814 |  | 3300 | 650 | 10520 | 15119 | 2650 | 7220 |
| 47,689 | 10,817 | 154,783 | 221,671 | 36,873 | 107,094 |  | 3225 | 732 | 10468 | 14992 | 2494 | 7243 |
| 31,327 | 5,262 | 100,277 | 153,096 | 26,065 | 68,950 |  | 3512 | 590 | 11241 | 17162 | 2922 | 7729 |
| 37,865 | 8,595 | 126,673 | 172,481 | 29,270 | 88,808 |  | 3570 | 810 | 11944 | 16264 | 2760 | 8374 |
| 36,904 | 10,693 | 126,212 | 165,490 | 26,211 | 89,308 |  | 3629 | 1052 | 12412 | 16274 | 2578 | 8782 |
| 32,856 | 6,453 | 110,231 | 137,478 | 26,403 | 77,375 |  | 3702 | 727 | 12421 | 15492 | 2975 | 8719 |
| 31,179 | 9,075 | 100,306 | 153,719 | 22,103 | 69,127 |  | 3574 | 1040 | 11498 | 17621 | 2534 | 7924 |
|  |  |  |  |  |  |  |  |  |  |  |  |  |

1. Table shows results of High-Resolution Respirometry analysis data in pmol of O2/s/ cells or IU as a response to long term (7 days) exposition to P2 (PETG; Jet Black; Prusament) filament material.

| **P3 (HRR)** | | | | | |  | **P3 (CS)** | | | | | |
| --- | --- | --- | --- | --- | --- | --- | --- | --- | --- | --- | --- | --- |
| **ROUT** | **LEAK** | **ETS** | **CIV** | **R-L** | **E-R** |  | **ROUT** | **LEAK** | **ETS** | **CIV** | **R-L** | **E-R** |
| 47,753 | 9,705 | 140,564 | 183,092 | 38,048 | 92,811 |  | 3785 | 769 | 11142 | 14513 | 3016 | 7357 |
| 50,955 | 10,098 | 149,580 | 194,111 | 40,857 | 98,626 |  | 4085 | 810 | 11992 | 15562 | 3275 | 7907 |
| 55,169 | 10,546 | 161,322 | 197,024 | 44,623 | 106,153 |  | 4002 | 765 | 11701 | 14291 | 3237 | 7700 |
| 38,457 | 10,608 | 124,337 | 163,075 | 27,849 | 85,880 |  | 3923 | 1082 | 12682 | 16634 | 2841 | 8760 |
| 40,700 | 7,125 | 120,255 | 141,058 | 33,575 | 79,555 |  | 3493 | 612 | 10322 | 12107 | 2882 | 6828 |
| 38,182 | 7,368 | 114,236 | 149,703 | 30,813 | 76,054 |  | 3271 | 631 | 9788 | 12827 | 2640 | 6516 |
| 44,837 | 9,163 | 134,849 | 170,024 | 35,904 | 91,046 |  | 3750 | 784 | 11172 | 14405 | 29777 | 7519 |
|  |  |  |  |  |  |  |  |  |  |  |  |  |
| **CTRL5 (HRR)** | | | | | |  | **CTRL5 (CS)** | | | | | |
| **ROUT** | **LEAK** | **ETS** | **CIV** | **R-L** | **E-R** |  | **ROUT** | **LEAK** | **ETS** | **CIV** | **R-L** | **E-R** |
| 30,997 | 6,109 | 98,811 | 142,004 | 24,888 | 67,814 |  | 3300 | 650 | 10520 | 15119 | 2650 | 7220 |
| 47,689 | 10,817 | 154,783 | 221,671 | 36,873 | 107,094 |  | 3225 | 732 | 10468 | 14992 | 2494 | 7243 |
| 31,327 | 5,262 | 100,277 | 153,096 | 26,065 | 68,950 |  | 3512 | 590 | 11241 | 17162 | 2922 | 7729 |
| 37,865 | 8,595 | 126,673 | 172,481 | 29,270 | 88,808 |  | 3570 | 810 | 11944 | 16264 | 2760 | 8374 |
| 36,904 | 10,693 | 126,212 | 165,490 | 26,211 | 89,308 |  | 3629 | 1052 | 12412 | 16274 | 2578 | 8782 |
| 32,856 | 6,453 | 110,231 | 137,478 | 26,403 | 77,375 |  | 3702 | 727 | 12421 | 15492 | 2975 | 8719 |
| 31,179 | 9,075 | 100,306 | 153,719 | 22,103 | 69,127 |  | 3574 | 1040 | 11498 | 17621 | 2534 | 7924 |
|  |  |  |  |  |  |  |  |  |  |  |  |  |

1. Table shows results of High-Resolution Respirometry analysis data in pmol of O2/s/ cells or IU as a response to long term (7 days) exposition to P2 (PC; Blend; Prusament) filament material.

# STATISTICS

Folowing tables represent statistical Comparison after Filament Exposure. The comparison was performed after both 24 hours and 7 days of exposure. The table includes two key statistical columns: Normality Test (Shapiro–Wilk), where red numbers denote a statistically non-normal distribution of the raw data. The subsequent column shows the results of the non-parametric Mann-Whitney U test (M/W U test); here, red numbers indicate a statistically significant difference (p < 0.05) in cell count between the exposed cells and the untreated control group, signifying a cytotoxic effect.

| **CC 24h** | **RAW Norm. test** | **Normal distribution** | | **Ratio [%] Sample/CTRL** | **Nonparametric M/W U test** | |
| --- | --- | --- | --- | --- | --- | --- |
| **AVRG** | **SD** | **ALPHA** | **SIG** |
| CTRL1 | **0,00779** | 4905 | 459 | 100,0 |  |  |
| F1 | 0,05431 | 4795 | 524 | 97,8 | 0,72031 |  |
| F2 | **0,0363** | 4846 | 504 | 98,8 | 0,92493 |  |
| F3 | 0,15223 | 4960 | 500 | 101,1 | 0,50954 |  |
| F4 | **0,00377** | 4934 | 457 | 100,6 | 0,93991 |  |
| CTRL2 | **0,01787** | 5009 | 499 | 100,0 |  |  |
| F5 | 0,10567 | 4885 | 504 | 97,5 | 0,46693 |  |
| F6 | 0,06982 | 5050 | 447 | 100,8 | 0,80646 |  |
| F7 | 0,09628 | 5094 | 489 | 101,7 | 0,58473 |  |
| F8 | **8,35E-04** | 5053 | 454 | 100,9 | 0,74865 |  |
| CTRL3 | 5,89E-01 | 5151 | 414 | 100,0 |  |  |
| F9 | **0,00226** | 4933 | 505 | 95,8 | 0,30882 |  |
| F10 | **0,00193** | 4877 | 487 | 94,7 | **0,04181** | * |
| F11 | **0,00228** | 4839 | 577 | 94,0 | 0,07342 |  |
| P1 | **0,00173** | 4951 | 537 | 96,1 | 0,31791 |  |
| CTRL4 | **0,00812** | 5060 | 400 | 100,0 |  |  |
| P2 | **0,01393** | 4928 | 393 | 97,4 | 0,14677 |  |
| P3 | **0,00244** | 5030 | 363 | 99,4 | 0,57181 |  |
| S1 | **0,02501** | 4984 | 345 | 98,5 | 0,26621 |  |
| V1 | **0,00278** | 5123 | 460 | 104,4 | 0,5591 |  |
| **CC 7 days** | **RAW Norm. test** | **Normal distribution** | | **Ratio [%] Sample/CTRL** | **Nonparametric M/W U test** | |
| **AVRG** | **SD** | **ALPHA** | **SIG** |
| CTRL1 | 0,45216 | 10002 | 232 | 100,0 |  |  |
| F1 | 0,52876 | 9958 | 304 | 99,6 | 0,76298 |  |
| F2 | 0,59608 | 9970 | 350 | 99,7 | 0,63753 |  |
| F3 | 0,59054 | 9911 | 457 | 99,1 | 0,2067 |  |
| F4 | 0,09296 | 10179 | 354 | 101,8 | 0,26617 |  |
| CTRL2 | 0,60155 | 10230 | 307 | 102,3 |  |  |
| F5 | 0,95346 | 10996 | 651 | 109,9 | **7,19E-04** | * |
| F6 | 0,1417 | 10119 | 400 | 101,2 | 0,21308 |  |
| F7 | 0,4805 | 10603 | 346 | 106,0 | 0,44971 |  |
| F8 | **0,00030398** | 10286 | 600 | 102,8 | 0,37379 |  |
| CTRL3 | **0,00272** | 10436 | 866 | 104,3 |  |  |
| F9 | 0,84322 | 10277 | 320 | 102,7 | 0,52014 |  |
| F10 | 0,26874 | 13118 | 882 | 131,2 | **4,44E-04** | * |
| F11 | 0,53621 | 9967 | 331 | 99,6 | 0,08094 |  |
| P1 | 0,73715 | 10483 | 421 | 104,8 | 0,25726 |  |
| CTRL4 | **0,00159** | 10333 | 276 | 103,3 |  |  |
| P2 | **0,00987** | 13549 | 1073 | 135,5 | **1,49E-06** | * |
| P3 | 0,36378 | 11709 | 379 | 117,1 | **1,49E-06** | * |
| S1 | **0,02261** | 11051 | 1328 | 110,5 | 0,46172 |  |
| V1 | 0,0667 | 12878 | 846 | 128,7 | **1,49E-06** | * |

1. Table shows results of statistical comparison of Cell count in single well (96) (bb) of untreated (CTRL) cells and cells exposed to filament materials - after 24h and 7th day of experiment.

| **SCF 24h** | **RAW Norm. test** | **Normal distribution** | | **Ratio [%] Sample/CTRL** | **Nonparametric M/W U test** | |
| --- | --- | --- | --- | --- | --- | --- |
| **AVRG** | **SD** | **ALPHA** | **SIG** |
| CTRL1 | 0,219 | 36,84 | 5,43 | 100,0 |  |  |
| F1 | 0,496 | 37,73 | 3,92 | 102,4 | 0,534 |  |
| F2 | 0,351 | 36,77 | 3,08 | 99,8 | 0,955 |  |
| F3 | 0,211 | 35,96 | 2,70 | 97,6 | 0,925 |  |
| F4 | **0,002** | 35,19 | 2,23 | 95,5 | 0,585 |  |
| CTRL2 | 0,081 | 36,51 | 2,46 | 100,0 |  |  |
| F5 | 0,718 | 38,33 | 2,35 | 105,0 | **0,032** | * |
| F6 | 0,999 | 37,70 | 2,62 | 103,3 | 0,169 |  |
| F7 | 0,997 | 34,36 | 2,17 | 94,1 | **0,044** | * |
| F8 | 0,700 | 38,08 | 2,02 | 104,3 | **0,040** | * |
| CTRL3 | 0,052 | 35,90 | 3,53 | 100,0 |  |  |
| F9 | 0,429 | 38,58 | 2,74 | 107,5 | **0,018** | * |
| F10 | 0,363 | 33,18 | 2,44 | 92,4 | **0,020** | * |
| F11 | **0,022** | 39,75 | 3,01 | 110,7 | **0,003** | * |
| P1 | 0,441 | 38,41 | 2,87 | 107,0 | **0,030** | * |
| CTRL4 | 0,076 | 41,55 | 3,35 | 100,0 |  |  |
| P2 | 0,991 | 38,90 | 3,21 | 93,6 | **0,018** | * |
| P3 | 0,872 | 43,86 | 4,94 | 105,6 | 0,169 |  |
| S1 | 0,951 | 41,64 | 4,06 | 100,2 | 0,749 |  |
| V1 | 0,632 | 41,88 | 4,39 | 100,8 | 0,925 |  |
| **SCF 7 days** | **RAW Norm. test** | **Normal distribution** | | **Ratio [%] Sample/CTRL** | **Nonparametric M/W U test** | |
| **AVRG** | **SD** | **ALPHA** | **SIG** |
| CTRL1 | **0,04797** | 41,1 | 2,2 | 100,0 |  |  |
| F1 | 0,22368 | 37,3 | 3,2 | 90,6 | **0,001** | * |
| F2 | 0,27673 | 35,7 | 2,8 | 86,8 | **0,000** | * |
| F3 | 0,83727 | 38,4 | 2,7 | 93,4 | **0,003** | * |
| F4 | 0,16553 | 36,2 | 3,1 | 88,0 | **0,000** | * |
| CTRL2 | 0,98065 | 43,1 | 3,1 | 100,0 |  |  |
| F5 | 0,35114 | 42,3 | 3,2 | 98,2 | 0,647 |  |
| F6 | 0,95895 | 43,3 | 4,2 | 100,5 | 0,859 |  |
| F7 | 0,36419 | 45,5 | 4,2 | 105,5 | 0,161 |  |
| F8 | **0,01277** | 42,3 | 3,1 | 98,2 | 0,353 |  |
| CTRL3 | 0,56985 | 39,9 | 3,2 | 100,0 |  |  |
| F9 | **0,02603** | 40,2 | 3,9 | 100,8 | 0,603 |  |
| F10 | 0,73237 | 33,6 | 2,4 | 84,1 | **0,000** | * |
| F11 | 0,25592 | 43,3 | 2,4 | 108,4 | **0,035** | * |
| P1 | 0,84329 | 40,9 | 2,3 | 102,3 | 0,481 |  |
| CTRL4 | 0,13226 | 44,3 | 3,8 | 100,0 |  |  |
| P2 | 0,89033 | 34,5 | 2,9 | 78,0 | **0,000** | * |
| P3 | 0,93166 | 40,5 | 3,2 | 91,4 | **0,011** | * |
| S1 | 0,50518 | 36,6 | 5,2 | 82,6 | **0,000** | * |
| V1 | 0,90563 | 34,8 | 4,4 | 78,5 | **0,000** | * |

1. Table shows results of statistical comparison of Single cell fluorescent in FU (NucBlue) of untreated (CTRL) cells and cells exposed to filament materials - after 24h and 7th day of experiment.

| **SCPB [x10-4] 24h** | RAW Norm. test | Normal distribution | | **Ratio [%] Sample/CTRL** | Nonparametric M/W U test | |
| --- | --- | --- | --- | --- | --- | --- |
| AVRG | SD | ALPHA | SIG |
| CTRL1 | **0,02856** | 4,94 | 0,25 | 100,0 |  |  |
| F1 | 0,36995 | 5,41 | 0,33 | 109,6 | **0,0003191** | * |
| F2 | 0,49229 | 5,35 | 0,34 | 108,3 | **0,00349** | * |
| F3 | 0,63497 | 5,12 | 0,36 | 103,8 | 0,29999 |  |
| F4 | 0,12731 | 5,09 | 0,33 | 103,2 | 0,29999 |  |
| *CTRL2* | 0,47738 | 4,51 | 0,18 | 100,0 |  |  |
| F5 | 0,12065 | 5,07 | 0,44 | 112,4 | **0,0001425** | * |
| F6 | 0,4272 | 5,14 | 0,39 | 113,9 | **1,342E-05** | * |
| F7 | 0,96335 | 4,56 | 0,26 | 101,1 | 0,58473 |  |
| F8 | 0,42089 | 5,07 | 0,30 | 112,3 | **1,13E-05** | * |
| *CTRL3* | 0,63506 | 4,87 | 0,32 | 100,0 |  |  |
| F9 | 0,558 | 5,31 | 0,45 | 109,0 | **0,00629** | * |
| F10 | 0,91045 | 4,74 | 0,30 | 97,3 | 0,15756 |  |
| F11 | 0,81463 | 5,63 | 0,46 | 115,5 | **5,088E-05** | * |
| P1 | 0,20482 | 5,43 | 0,24 | 111,3 | **5,973E-05** | * |
| *CTRL4* | 0,68262 | 5,12 | 0,40 | 100,0 |  |  |
| P2 | 0,96874 | 5,72 | 0,24 | 111,9 | **8,20E-05** | * |
| P3 | 0,13154 | 6,35 | 0,44 | 124,1 | **1,54E-06** | * |
| S1 | 0,97635 | 6,08 | 0,31 | 118,9 | **4,67E-06** | * |
| V1 | 0,68478 | 5,91 | 0,47 | 115,5 | **2,05E-04** | * |
| **SCPB [x10-4] 7 days** | RAW Norm. test? | Normal distribution | | **Ratio Sample/CTRL** | Nonparametric M/W U test | |
| AVRG | SD | ALPHA | SIG |
| CTRL1 | 0,21124 | 4,99 | 0,41 | 100,0 |  |  |
| F1 | **0,00996** | 4,84 | 0,49 | 97,0 | 0,35581 |  |
| F2 | **0,00209** | 4,75 | 0,40 | 95,2 | **0,03997** | * |
| F3 | **0,02245** | 4,87 | 0,45 | 97,7 | 0,48565 |  |
| F4 | **0,01998** | 4,63 | 0,33 | 92,9 | **0,00629** | * |
| *CTRL2* | 0,79111 | 5,12 | 0,39 | 100,0 |  |  |
| F5 | 0,65448 | 5,08 | 0,43 | 99,2 | 0,71066 |  |
| F6 | 0,84896 | 5,41 | 0,46 | 105,6 | 0,09297 |  |
| F7 | 0,57665 | 5,64 | 0,24 | 110,0 | **2,98E-04** | * |
| F8 | 0,35819 | 5,28 | 0,38 | 103,1 | 0,17265 |  |
| *CTRL3* | 0,15748 | 5,20 | 0,53 | 100,0 |  |  |
| F9 | 0,34865 | 5,28 | 0,30 | 101,6 | 0,83029 |  |
| F10 | 0,10681 | 4,31 | 0,19 | 82,9 | **5,82E-04** | * |
| F11 | 0,98961 | 5,61 | 0,30 | 108,0 | 0,0618 |  |
| P1 | 0,17811 | 5,39 | 0,36 | 103,6 | 0,6027 |  |
| *CTRL4* | 0,25644 | 5,79 | 0,34 | 100,0 |  |  |
| P2 | 0,41226 | 4,15 | 0,53 | 71,7 | **1,54E-06** | * |
| P3 | 0,88067 | 5,02 | 0,37 | 86,8 | **1,34E-05** | * |
| S1 | 0,35145 | 5,32 | 0,53 | 91,9 | **0,00394** | * |
| V1 | 0,5211 | 4,77 | 0,52 | 82,4 | **9,49E-06** | * |

1. Table shows results of statistical comparison of Single cell Prestoblue reduction rate (SCPB) of untreated (CTRL) cells and cells exposed to filament materials - after 24h and 7th day of experiment.

| **HRR ROUT** | RAW Norm. test | Normal distribution | | **Ratio [%] Sample/CTRL** | Nonparametric M/W U test | |
| --- | --- | --- | --- | --- | --- | --- |
| AVRG | SD | ALPHA | **SIG** |
| CTRL4 | 0,88 | 46,2 | 5,7 | -28,15 | **0,005** | * |
| F4 | 0,06 | 36,0 | 8,0 |
| CTRL3 | 0,41 | 44,5 | 3,0 | -8,86 | 0,318 |  |
| F5 | 0,62 | 40,9 | 7,7 |
| CTRL1 | 0,12 | 37,9 | 3,6 | -3,61 | 0,611 |  |
| F8 | 0,23 | 36,6 | 4,3 |
| CTRL4 | 0,88 | 46,2 | 5,7 | -143,21 | **9,39E-04** | * |
| F10 | 0,53 | 19,0 | 3,0 |
| CTRL5 | **0,04** | 35,5 | 6,0 | 23,04 | **0,018** | * |
| P2 | 0,13 | 46,2 | 8,7 |
| CTRL5 | **0,04** | 35,5 | 6,0 | 21,36 | **0,012** | * |
| P3 | 0,33 | 45,2 | 7,1 |
| **HRR LEAK** | RAW Norm. test | Normal distribution | | **Ratio [%] Sample/CTRL** | Nonparametric M/W U test | |
| AVRG | SD | ALPHA | SIG |
| CTRL4 | 0,27 | 10,3 | 1,2 | -32,24 | 0,052 |  |
| F4 | **0,00** | 7,8 | 2,9 |
| CTRL3 | 0,61 | 8,2 | 1,4 | -18,96 | 0,104 |  |
| F5 | 0,77 | 6,9 | 1,8 |
| CTRL1 | **0,04** | 12,1 | 1,6 | 9,92 | 0,227 |  |
| F8 | 0,19 | 13,4 | 3,0 |
| CTRL4 | 0,27 | 10,3 | 1,2 | 29,92 | **1,95E-03** | * |
| F10 | 0,23 | 14,6 | 2,5 |
| CTRL5 | 0,38 | 8,1 | 2,2 | 16,43 | 0,284 |  |
| P2 | 0,42 | 9,7 | 2,1 |
| CTRL5 | 0,38 | 8,1 | 2,2 | 11,88 | 0,520 |  |
| P3 | 0,06 | 9,2 | 1,6 |
| **HRR ETS** | RAW Norm. test | Normal distribution | | **Ratio [%] Sample/CTRL** | Nonparametric M/W U test | |
| AVRG | SD | ALPHA | SIG |
| CTRL4 | 0,94 | 139,5 | 21,7 | -14,45 | 0,083 |  |
| F4 | 0,92 | 121,9 | 11,5 |
| CTRL3 | 0,88 | 129,3 | 10,5 | 6,17 | 0,564 |  |
| F5 | 0,66 | 137,8 | 25,0 |
| CTRL1 | 0,23 | 113,0 | 9,3 | 2,15 | 0,875 |  |
| F8 | 0,39 | 115,5 | 12,6 |
| CTRL4 | 0,94 | 139,5 | 21,7 | 12,01 | 0,19 |  |
| F10 | 0,79 | 158,5 | 24,2 |
| CTRL5 | 0,13 | 116,8 | 20,6 | 18,15 | 0,134 |  |
| P2 | **0,04** | 142,7 | 27,6 |
| CTRL5 | 0,13 | 116,8 | 20,6 | 13,55 | 0,175 |  |
| P3 | 0,65 | 135,0 | 18,4 |

1. Table shows results of statistical evaluation of mitochondria respiration states ROUT (Routine Respiration); LEAK (Leak Respiration (Proton Leak)); ETS (Electron Transport System) using High-Resolution Respirometry as a response to long term (7 days) exposition to filament materials. Data in table has units pmol of O2/s/cells (HRR measured in millions of cells)

| **HRR CIV** | RAW Norm. test | Normal distribution | | **Ratio [%] Sample/CTRL** | Nonparametric M/W U test | |
| --- | --- | --- | --- | --- | --- | --- |
| AVRG | SD | ALPHA | SIG |
| CTRL4 | 0,44 | 173,8 | 32,5 | -15,21 | 0,189 |  |
| F4 | 0,87 | 150,9 | 21,8 |
| CTRL3 | 0,71 | 153,6 | 22,5 | 11,05 | 0,318 |  |
| F5 | 0,79 | 172,7 | 37,6 |
| CTRL1 | 0,23 | 138,7 | 11,2 | 18,86 | **0,007** | * |
| F8 | 0,61 | 170,9 | 23,0 |
| CTRL4 | 0,44 | 173,8 | 32,5 | 2,56 | 0,87 |  |
| F10 | 0,65 | 178,4 | 29,9 |
| CTRL5 | 0,09 | 163,7 | 28,3 | 7,78 | 0,284 |  |
| P2 | 0,22 | 177,5 | 29,0 |
| CTRL5 | 0,09 | 163,7 | 28,3 | 4,46 | 0,617 |  |
| P3 | 0,44 | 171,3 | 23,5 |
| **R-L** | RAW Norm. test | Normal distribution | | **Ratio [%] Sample/CTRL** | Nonparametric M/W U test | |
| AVRG | SD | ALPHA | SIG |
| CTRL4 | 1,00 | 35,9 | 6,2 | -29,00 | 0,093 |  |
| F4 | **0,00** | 27,8 | 10,6 |
| CTRL3 | 0,27 | 36,3 | 3,3 | -6,82 | 0,431 |  |
| F5 | 0,91 | 34,0 | 6,4 |
| CTRL1 | 0,79 | 25,8 | 2,5 | -11,46 | 0,104 |  |
| F8 | 0,80 | 23,2 | 2,7 |
| CTRL4 | 1,00 | 35,9 | 6,2 | -727,66 | **0,00** | * |
| F10 | 0,69 | 4,3 | 1,2 |
| CTRL5 | 0,12 | 27,4 | 4,7 | 24,81 | **0,018** | * |
| P2 | 0,09 | 36,4 | 6,7 |
| CTRL5 | 0,12 | 27,4 | 4,7 | 23,80 | **0,018** | * |
| P3 | 0,91 | 36,0 | 6,3 |
| **E-R** | RAW Norm. test | Normal distribution | | **Ratio [%] Sample/CTRL** | Nonparametric M/W U test | |
| AVRG | SD | ALPHA | SIG |
| CTRL4 | 0,94 | 93,3 | 16,3 | -8,70 | 0,318 |  |
| F4 | 0,68 | 85,8 | 13,6 |
| CTRL3 | 0,50 | 84,9 | 7,8 | 12,50 | 0,128 |  |
| F5 | 0,88 | 97,0 | 17,8 |
| CTRL1 | 0,92 | 75,1 | 6,5 | 4,83 | 0,431 |  |
| F8 | 0,18 | 78,9 | 8,6 |
| CTRL4 | 0,94 | 93,3 | 16,3 | 34,94 | **0,00** | * |
| F10 | 0,96 | 143,4 | 20,4 |
| CTRL5 | 0,19 | 81,2 | 14,6 | 15,81 | 0,175 |  |
| P2 | **0,03** | 96,5 | 19,0 |
| CTRL5 | 0,19 | 81,2 | 14,6 | 9,61 | 0,284 |  |
| P3 | 0,86 | 89,8 | 11,5 |

1. Table shows results of statistical evaluation of mitochondria respiration states CIV (Complex IV (Cytochrome c Oxidase); R-L (ROUTINE minus LEAK); and E-R (ETS minus ROUTINE) using High-Resolution Respirometry as a response to long term (7 days) exposition to filament materials. Data in table has units pmol of O2/s/cells (HRR measured in millions of cells)

| **CS ROUT** | RAW Norm. test | Normal distribution | | **Ratio [%] Sample/CTRL** | Nonparametric M/W U test | |
| --- | --- | --- | --- | --- | --- | --- |
| AVRG | SD | ALPHA | **SIG** |
| CTRL4 | 0,53 | 3394,4 | 267,7 | 6,40 | 0,318 |  |
| F4 | 0,72 | 3626,5 | 582,6 |
| CTRL3 | 0,53 | 3091,3 | 304,9 | -5,52 | 0,495 |  |
| F5 | 0,17 | 2929,7 | 312,6 |
| CTRL1 | 0,44 | 2508,8 | 244,9 | 2,96 | 0,495 |  |
| F8 | 0,77 | 2585,2 | 206,9 |
| CTRL4 | 0,53 | 3394,4 | 267,7 | -222,10 | **9,39E-04** | * |
| F10 | 0,90 | 1053,9 | 173,6 |
| CTRL5 | 0,31 | 3501,9 | 174,9 | 5,51 | 0,074 |  |
| P2 | 0,67 | 3706,3 | 162,4 |
| CTRL5 | 0,31 | 3501,9 | 174,9 | 6,86 | 0,175 |  |
| P3 | 0,49 | 3759,9 | 316,5 |
| **CS LEAK** | RAW Norm. test | Normal distribution | | **Ratio [%] Sample/CTRL** | Nonparametric M/W U test | |
| AVRG | SD | ALPHA | **SIG** |
| CTRL4 | 0,72 | 774,9 | 204,7 | -14,99 | 0,272 |  |
| F4 | 0,35 | 673,9 | 173,0 |
| CTRL3 | 0,49 | 572,4 | 123,5 | -15,13 | 0,189 |  |
| F5 | 0,68 | 497,2 | 122,4 |
| CTRL1 | 0,08 | 799,9 | 93,3 | 15,60 | **0,041** | * |
| F8 | 0,09 | 947,7 | 193,5 |
| CTRL4 | 0,72 | 774,9 | 204,7 | 4,92 | 0,495 |  |
| F10 | 0,19 | 815,0 | 151,6 |
| CTRL5 | 0,24 | 800,2 | 181,5 | -2,39 | 0,943 |  |
| P2 | 0,31 | 781,5 | 84,2 |
| CTRL5 | 0,24 | 800,2 | 181,5 | -2,84 | 1,000 |  |
| P3 | 0,23 | 778,1 | 169,0 |
| **CS ETS** | RAW Norm. test | Normal distribution | | **Ratio [%] Sample/CTRL** | Nonparametric M/W U test | |
| AVRG | SD | ALPHA | **SIG** |
| CTRL4 | 0,78 | 10206,4 | 751,1 | 11,44 | 0,156 |  |
| F4 | 0,24 | 11524,7 | 1733,6 |
| CTRL3 | 0,09 | 8984,6 | 942,5 | 9,19 | 0,104 |  |
| F5 | 0,12 | 9894,3 | 1032,6 |
| CTRL1 | 0,70 | 7477,2 | 600,2 | 8,38 | **0,041** | * |
| F8 | 0,08 | 8161,3 | 497,0 |
| CTRL4 | 0,78 | 10206,4 | 751,1 | -18,10 | **6,54E-03** | * |
| F10 | 0,44 | 8641,9 | 755,2 |
| CTRL5 | 0,33 | 11500,7 | 813,3 | -0,59 | 0,721 |  |
| P2 | 0,91 | 11433,3 | 283,8 |
| CTRL5 | 0,33 | 11500,7 | 813,3 | -2,04 | 0,721 |  |
| P3 | 0,92 | 11271,1 | 1078,4 |

1. Table shows results of statistical evaluation of mitochondria respiration states expressed as mUI of citrate synthase (CS) enzyme - ROUT (Routine Respiration); LEAK (Leak Respiration (Proton Leak)); ETS (Electron Transport System) using High-Resolution Respirometry as a response to long term (7 days) exposition to filament materials. Data in table has units pmol of O2/s/cells (HRR measured in millions of cells).

| **CS CIV** | RAW Norm. test | Normal distribution | | **Ratio [%] Sample/CTRL** | Nonparametric M/W U test | |
| --- | --- | --- | --- | --- | --- | --- |
| AVRG | SD | ALPHA | **SIG** |
| CTRL4 | 0,40 | 12710,7 | 1661,4 | 11,02 | 0,156 |  |
| F4 | 0,50 | 14284,4 | 2453,7 |
| CTRL3 | 0,52 | 10689,7 | 1781,7 | 13,39 | 0,128 |  |
| F5 | 0,76 | 12342,7 | 1621,5 |
| CTRL1 | 0,29 | 9207,3 | 1139,2 | 23,61 | **0,002** | * |
| F8a | 0,79 | 12053,2 | 908,9 |
| CTRL4 | 0,40 | 12710,7 | 1661,4 | -28,90 | **3,88E-03** | * |
| F10 | 0,75 | 9860,7 | 1363,5 |
| CTRL5 | 0,52 | 16131,8 | 1004,1 | -12,93 | **0,005** | * |
| P2 | 0,39 | 14284,4 | 657,6 |
| CTRL5 | 0,52 | 16131,8 | 1004,1 | -12,63 | 0,074 |  |
| P3 | 0,91 | 14322,2 | 1676,9 |
| **R-L mUI/ml** | RAW Norm. test | Normal distribution | | **Ratio [%] Sample/CTRL** | Nonparametric M/W U test | |
| AVRG | SD | ALPHA | **SIG** |
| CTRL4 | 0,33 | 2619,5 | 189,2 | 15,09 | **0,013** | * |
| F4 | 0,70 | 3085,2 | 338,0 |
| CTRL3 | 0,26 | 2518,9 | 256,8 | -3,55 | 0,793 |  |
| F5 | 0,20 | 2432,6 | 221,6 |
| CTRL1 | 0,10 | 1708,9 | 186,3 | -4,36 | 0,564 |  |
| F8a | 0,56 | 1637,5 | 148,4 |
| CTRL2 | 0,75 | 2186,3 | 96,1 | 2,12 | 0,793 |  |
| F10 | 0,82 | 238,8 | 57,3 |
| CTRL5 | 0,39 | 2701,7 | 189,9 | 7,63 | 0,100 |  |
| P2 | 0,30 | 2924,8 | 90,1 |
| CTRL5 | 0,39 | 2701,7 | 189,9 | 9,39 | 0,074 |  |
| P3 | 0,70 | 2981,8 | 244,6 |
| **E-R mUI/bb** | RAW Norm. test | Normal distribution | | **Ratio [%] Sample/CTRL** | Nonparametric M/W U test | |
| AVRG | SD | ALPHA | **SIG** |
| CTRL4 | 0,77 | 6812,0 | 560,5 | 13,75 | 0,083 |  |
| F4 | 0,56 | 7898,2 | 1243,2 |
| CTRL3 | 0,10 | 5893,3 | 662,9 | 15,38 | **0,014** | * |
| F5 | **0,02** | 6964,6 | 796,3 |
| CTRL1 | 0,90 | 4968,4 | 407,5 | 10,90 | **0,014** | * |
| F8a | **0,03** | 5576,1 | 315,9 |
| CTRL4 | 0,77 | 6812,0 | 560,5 | 10,66 | **0,024** | * |
| F10 | 0,55 | 7624,7 | 626,3 |
| CTRL5 | 0,35 | 7998,8 | 649,3 | -3,52 | 0,617 |  |
| P2 | 0,61 | 7727,0 | 156,5 |
| CTRL5 | 0,35 | 7998,8 | 649,3 | -6,49 | 0,284 |  |
| P3 | 0,93 | 7511,3 | 803,8 |

1. Table shows results of statistical evaluation of mitochondria respiration states expressed as mUI of citrate synthase (CS) enzyme - CIV (Complex IV (Cytochrome c Oxidase); R-L (ROUTINE minus LEAK); and E-R (ETS minus ROUTINE) using High-Resolution Respirometry as a response to long term (7 days) exposition to filament materials. Data in table has units pmol of O2/s/cells (HRR measured in millions of cells).

# Graphical representation of RAW data

Following figures presents Box-Whisker plots graphically representing the results of indirect short-term (24 hours) and long-term (7 days) exposure by various polymeric materials to the Human Dermal Fibroblasts (HDFs). Each plot compares the untreated control group (16 wells) with cells affected by the tested materials (16 wells). The Box-Whisker plots indicate the median (middle line), the Interquartile (IQ) range (box, representing the 25th to 75th percentiles), and the 1.5 times the IQ range (whiskers). Each individual data point represents one sample (well). Statistical significance is denoted by an asterisk: P < 0.05 indicates a statistically significant difference in cell count compared to the untreated control.


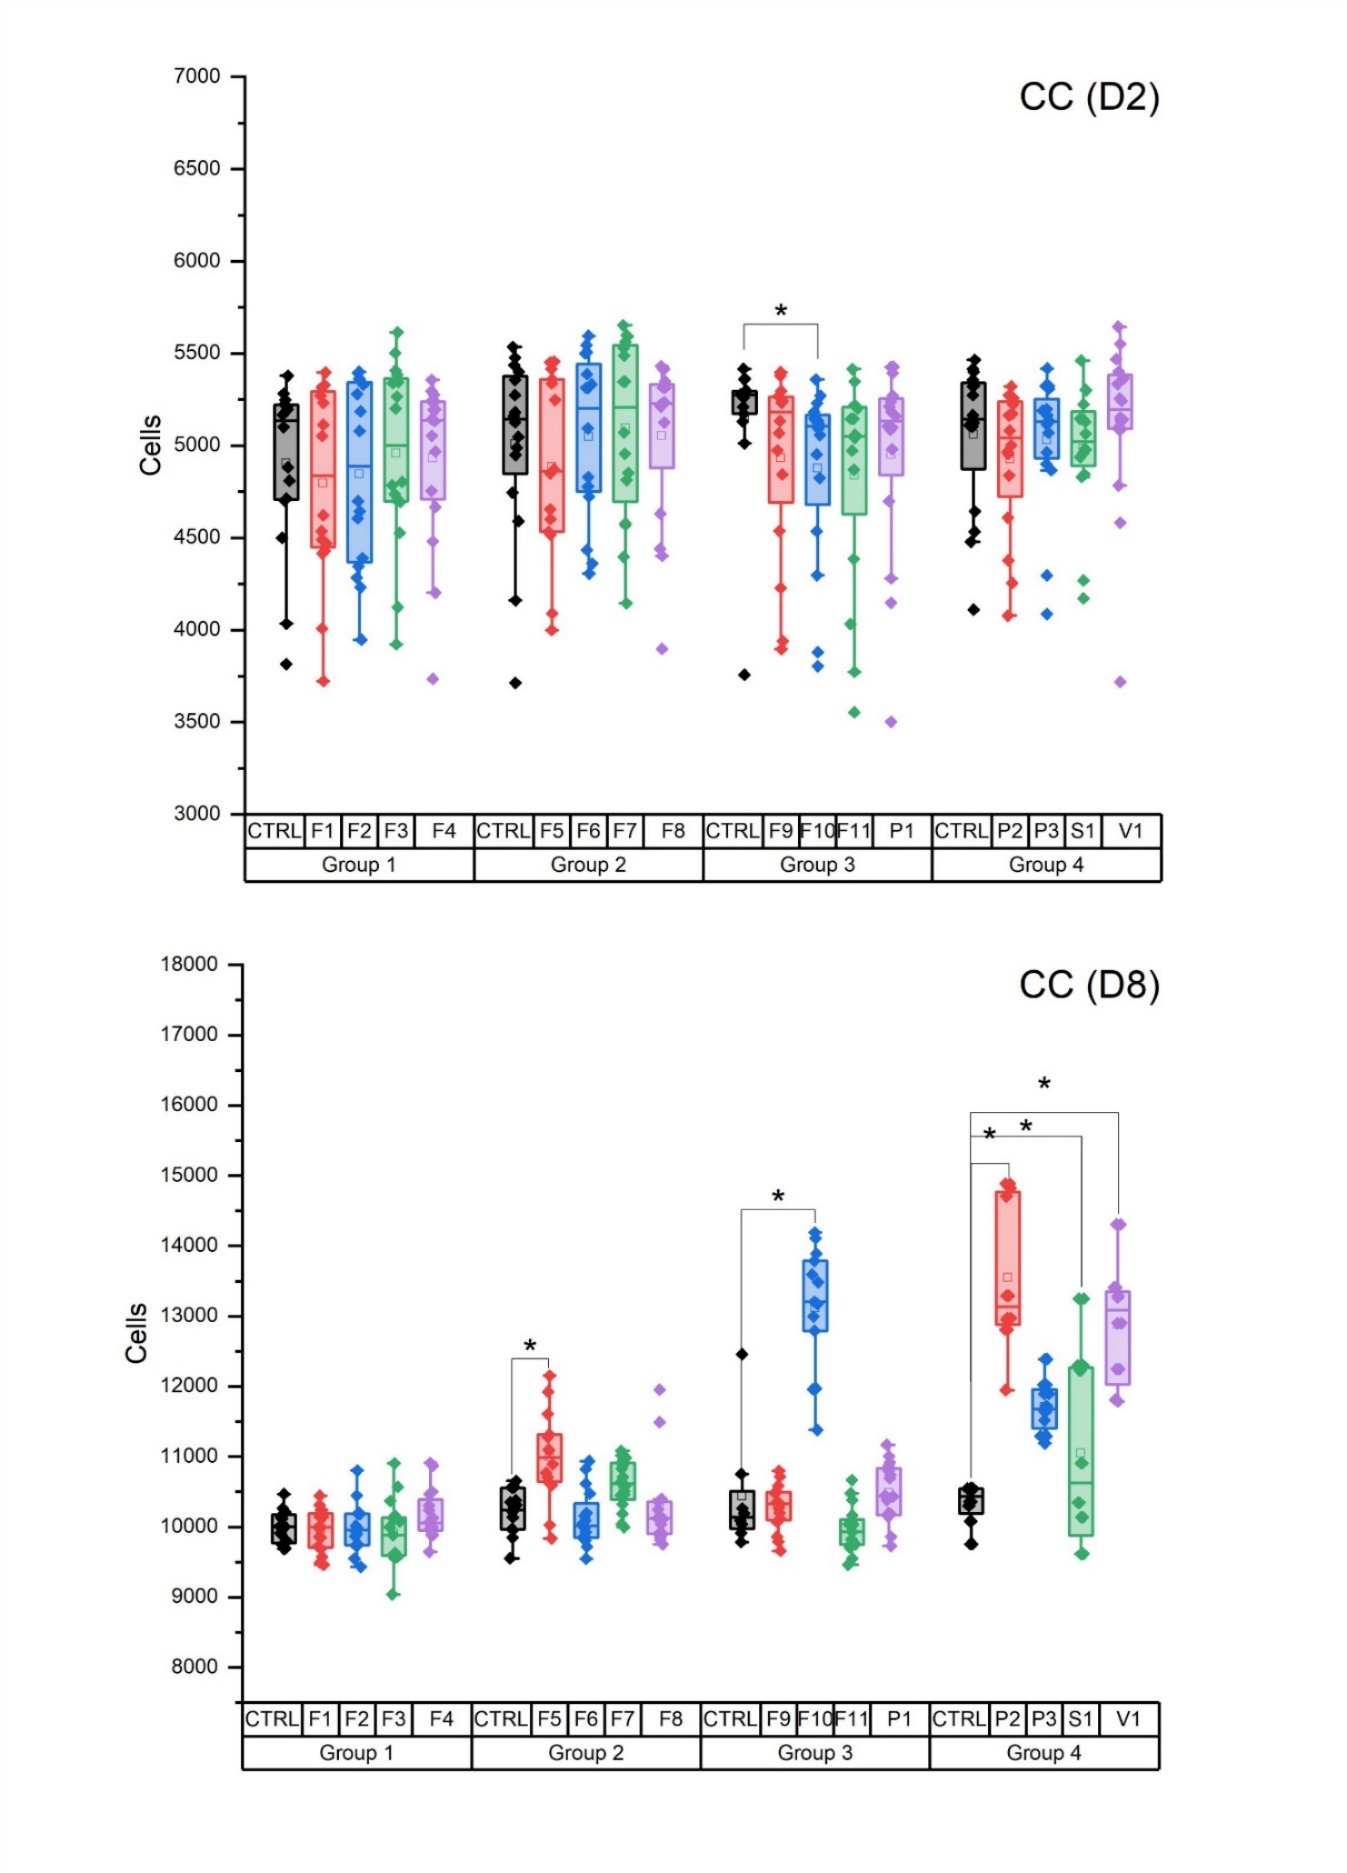


1. Results of cell growth (CC – cell count) after short-term (24 h) and long-term (7 days) exposure to different polymeric materials.).


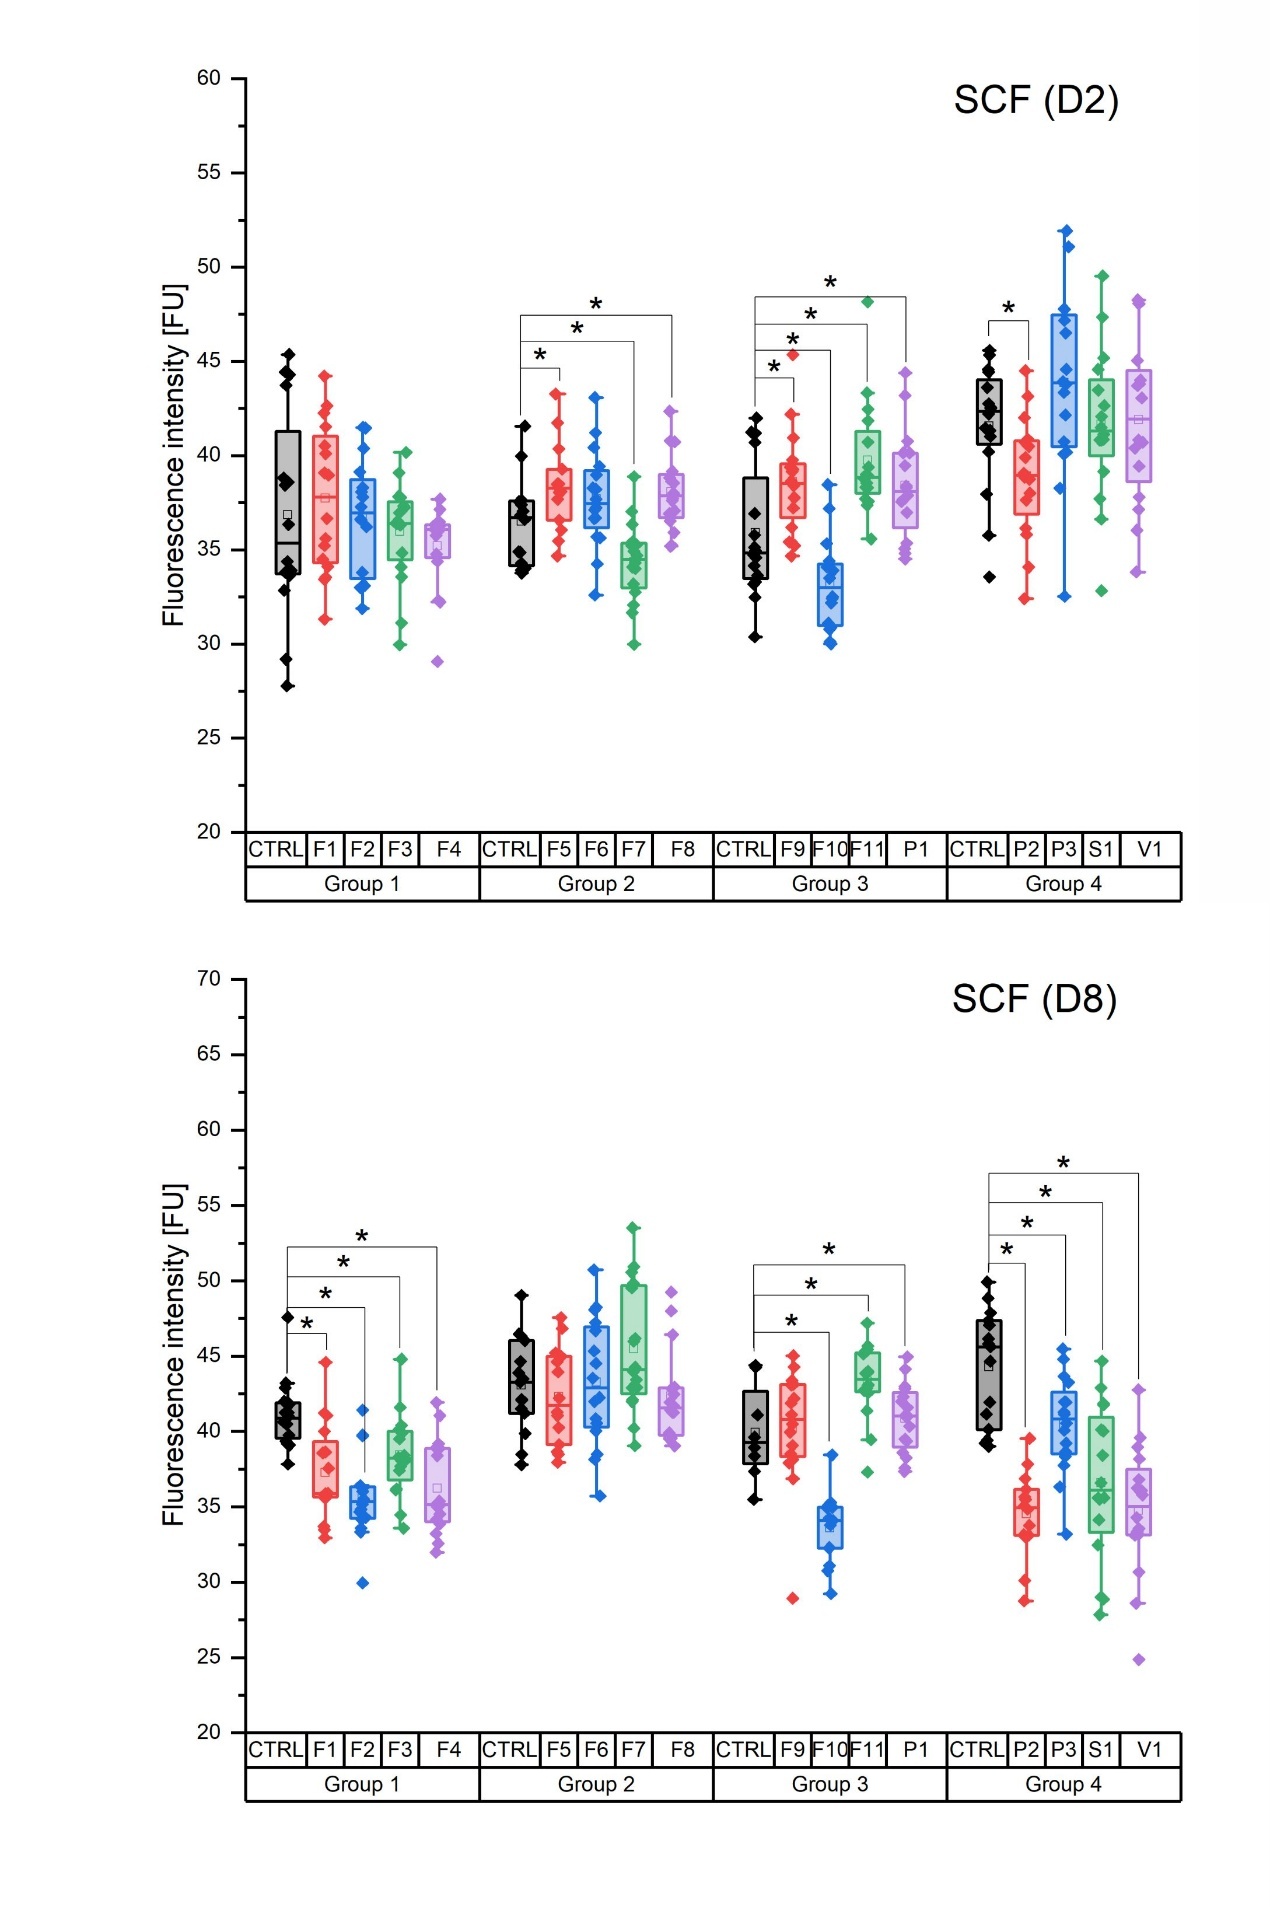


1. Results of Single cell fluorescence (SCF), the average intensity of the fluorescence signal from a single cell after short-term (24 h) and long-term (7 days) exposure to different polymeric materials.).


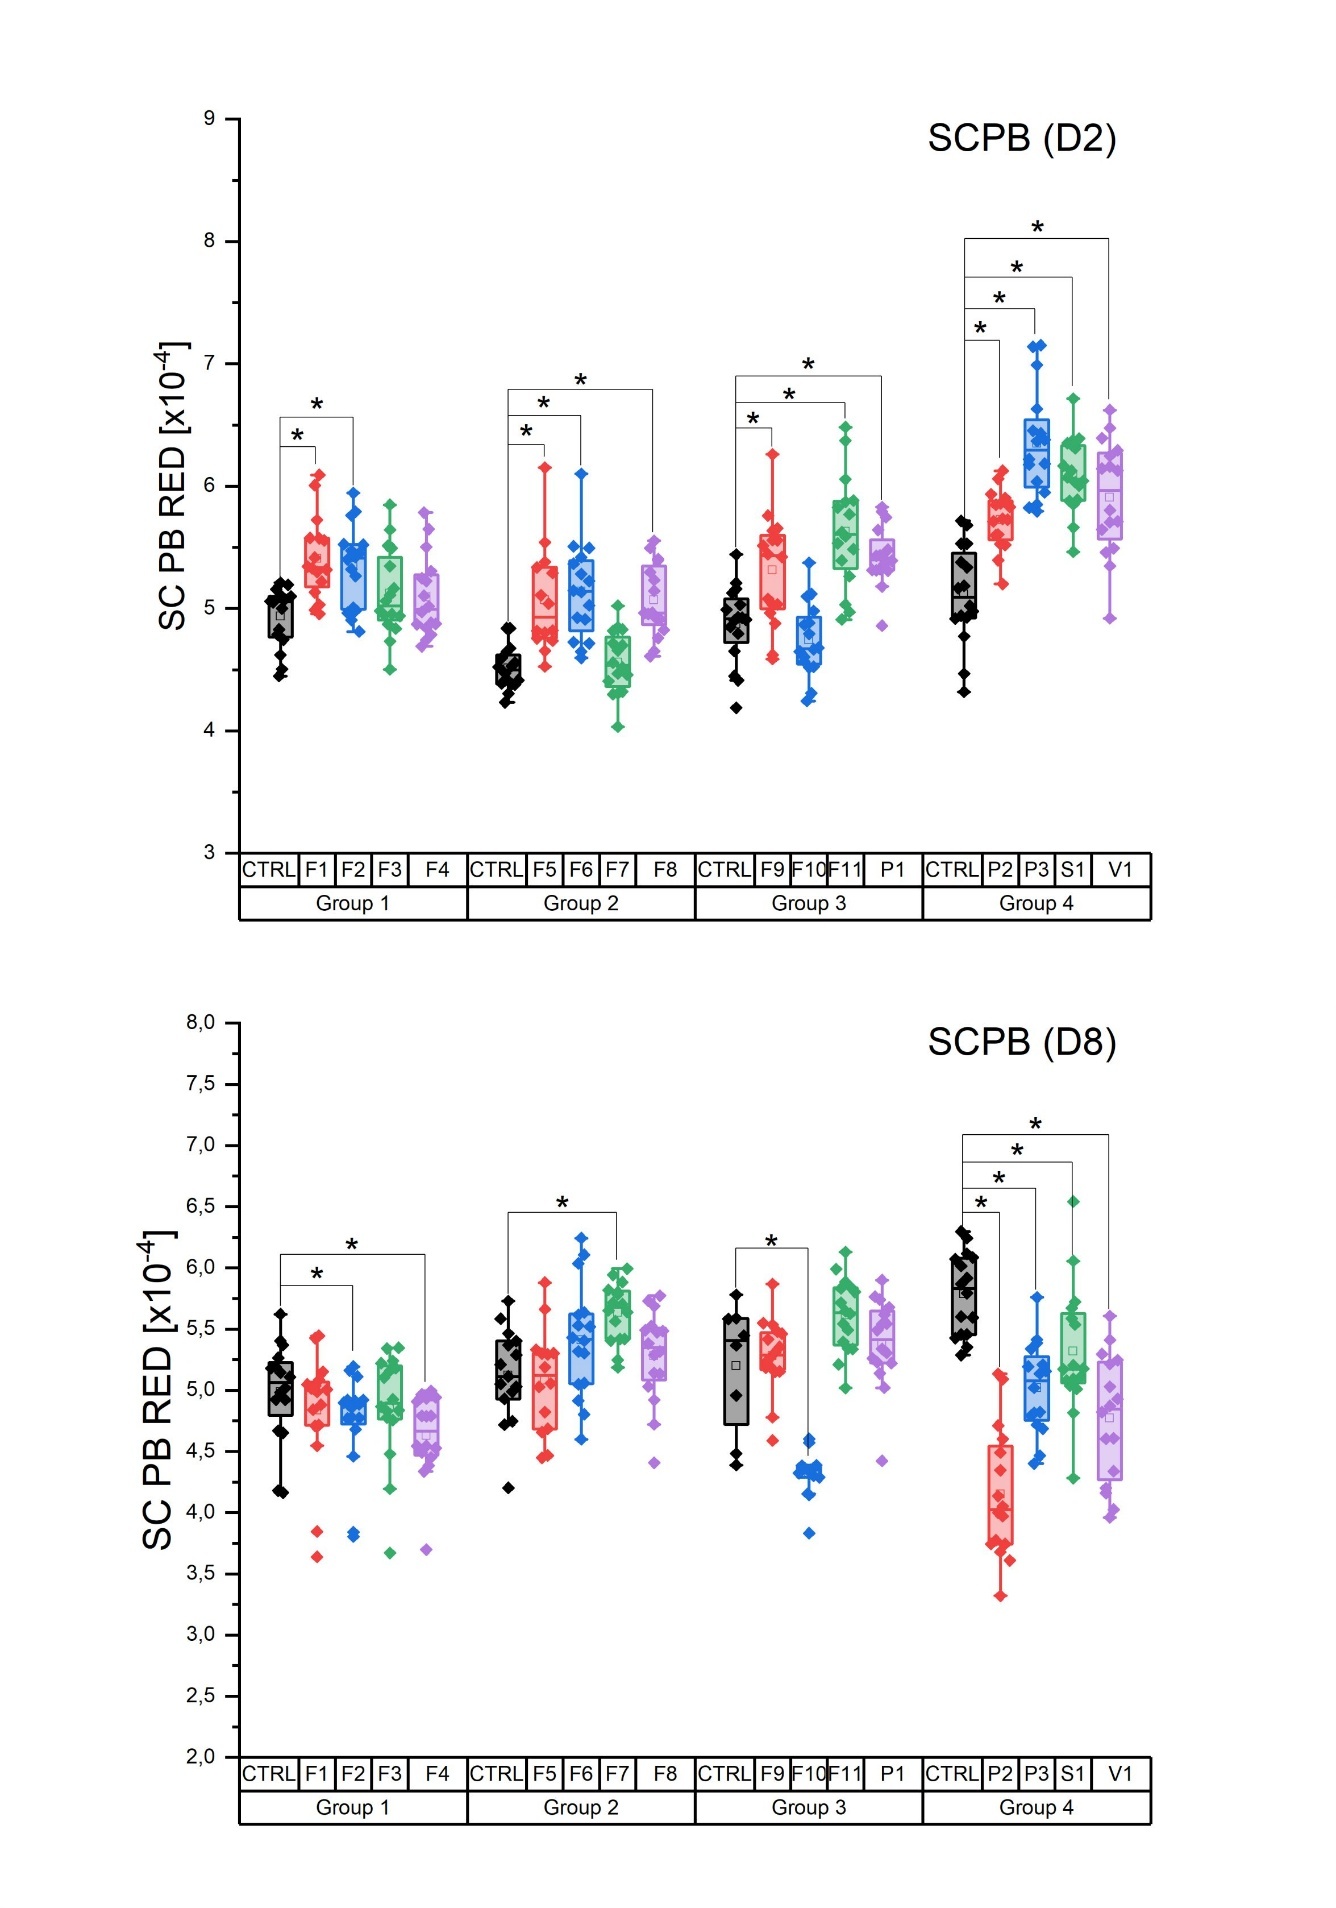


1. Results of Single Cell PrestoBlue reduction rate (SCPB), represents the ratio of reduction capacity between the treated and control cells and is normalized per cell after short-term (24 h) and long-term (7 days) exposure to different polymeric materials.).


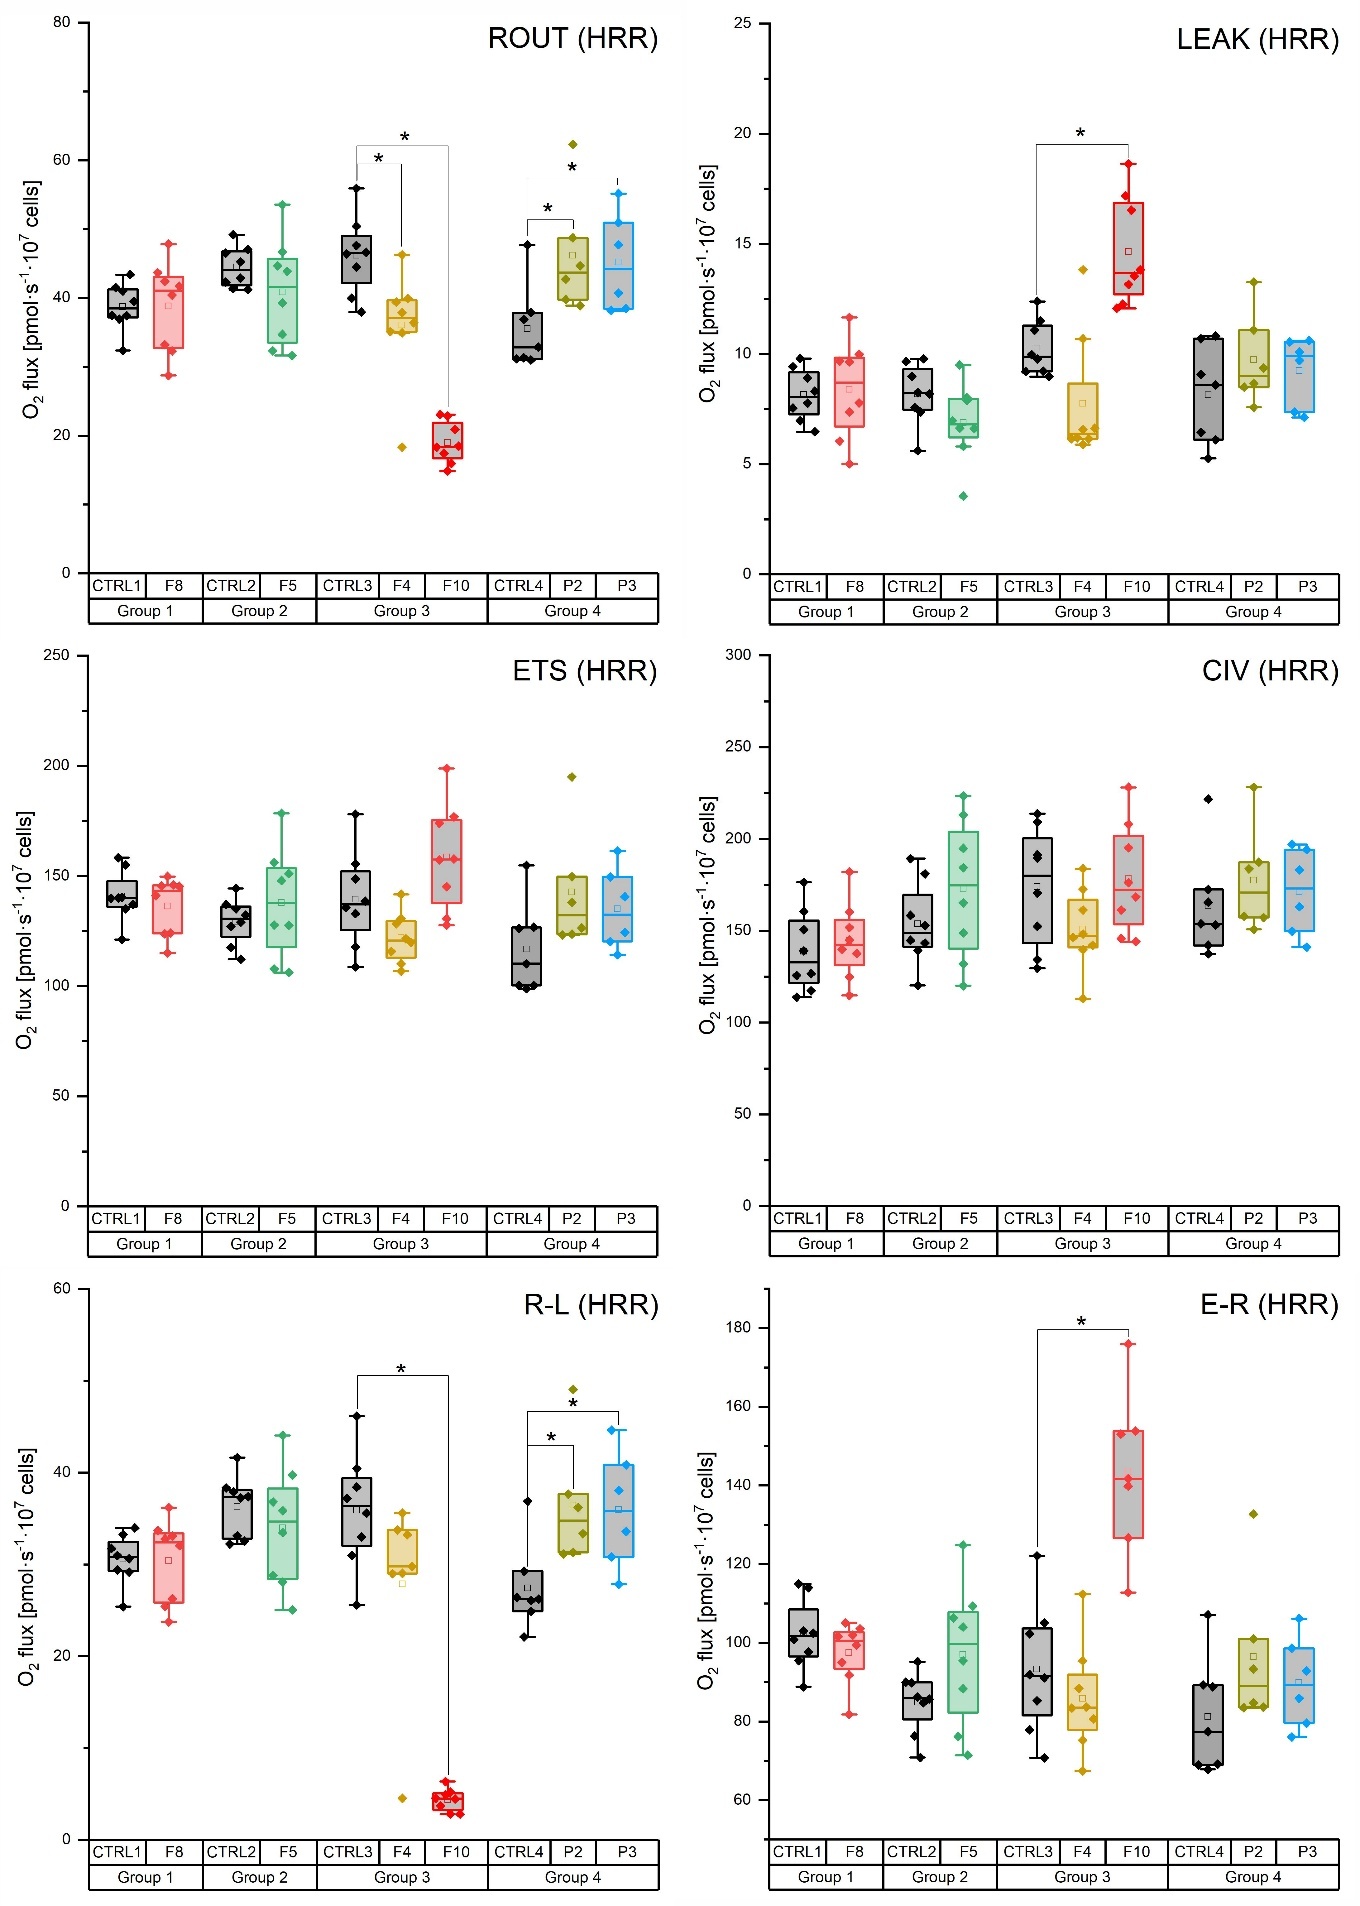


1. Results of High-Resolution Respirometry analysis (**measured in millions of cells**) In the plot box, data represents mitochondrial respiration (pmol O2/s/cells) in various states: Routine respiration, LEAK, uncoupled (ETS) and complex IV capacity. Calculated states express reserve ETS capacity (E-R) and routine respiration corrected for LEAK representing ATP-related oxygen consumption (R-L) in control fibroblasts (CTRL) and cells co-cultivated with various plastics on day 7 of the experiment as a response on filament material.


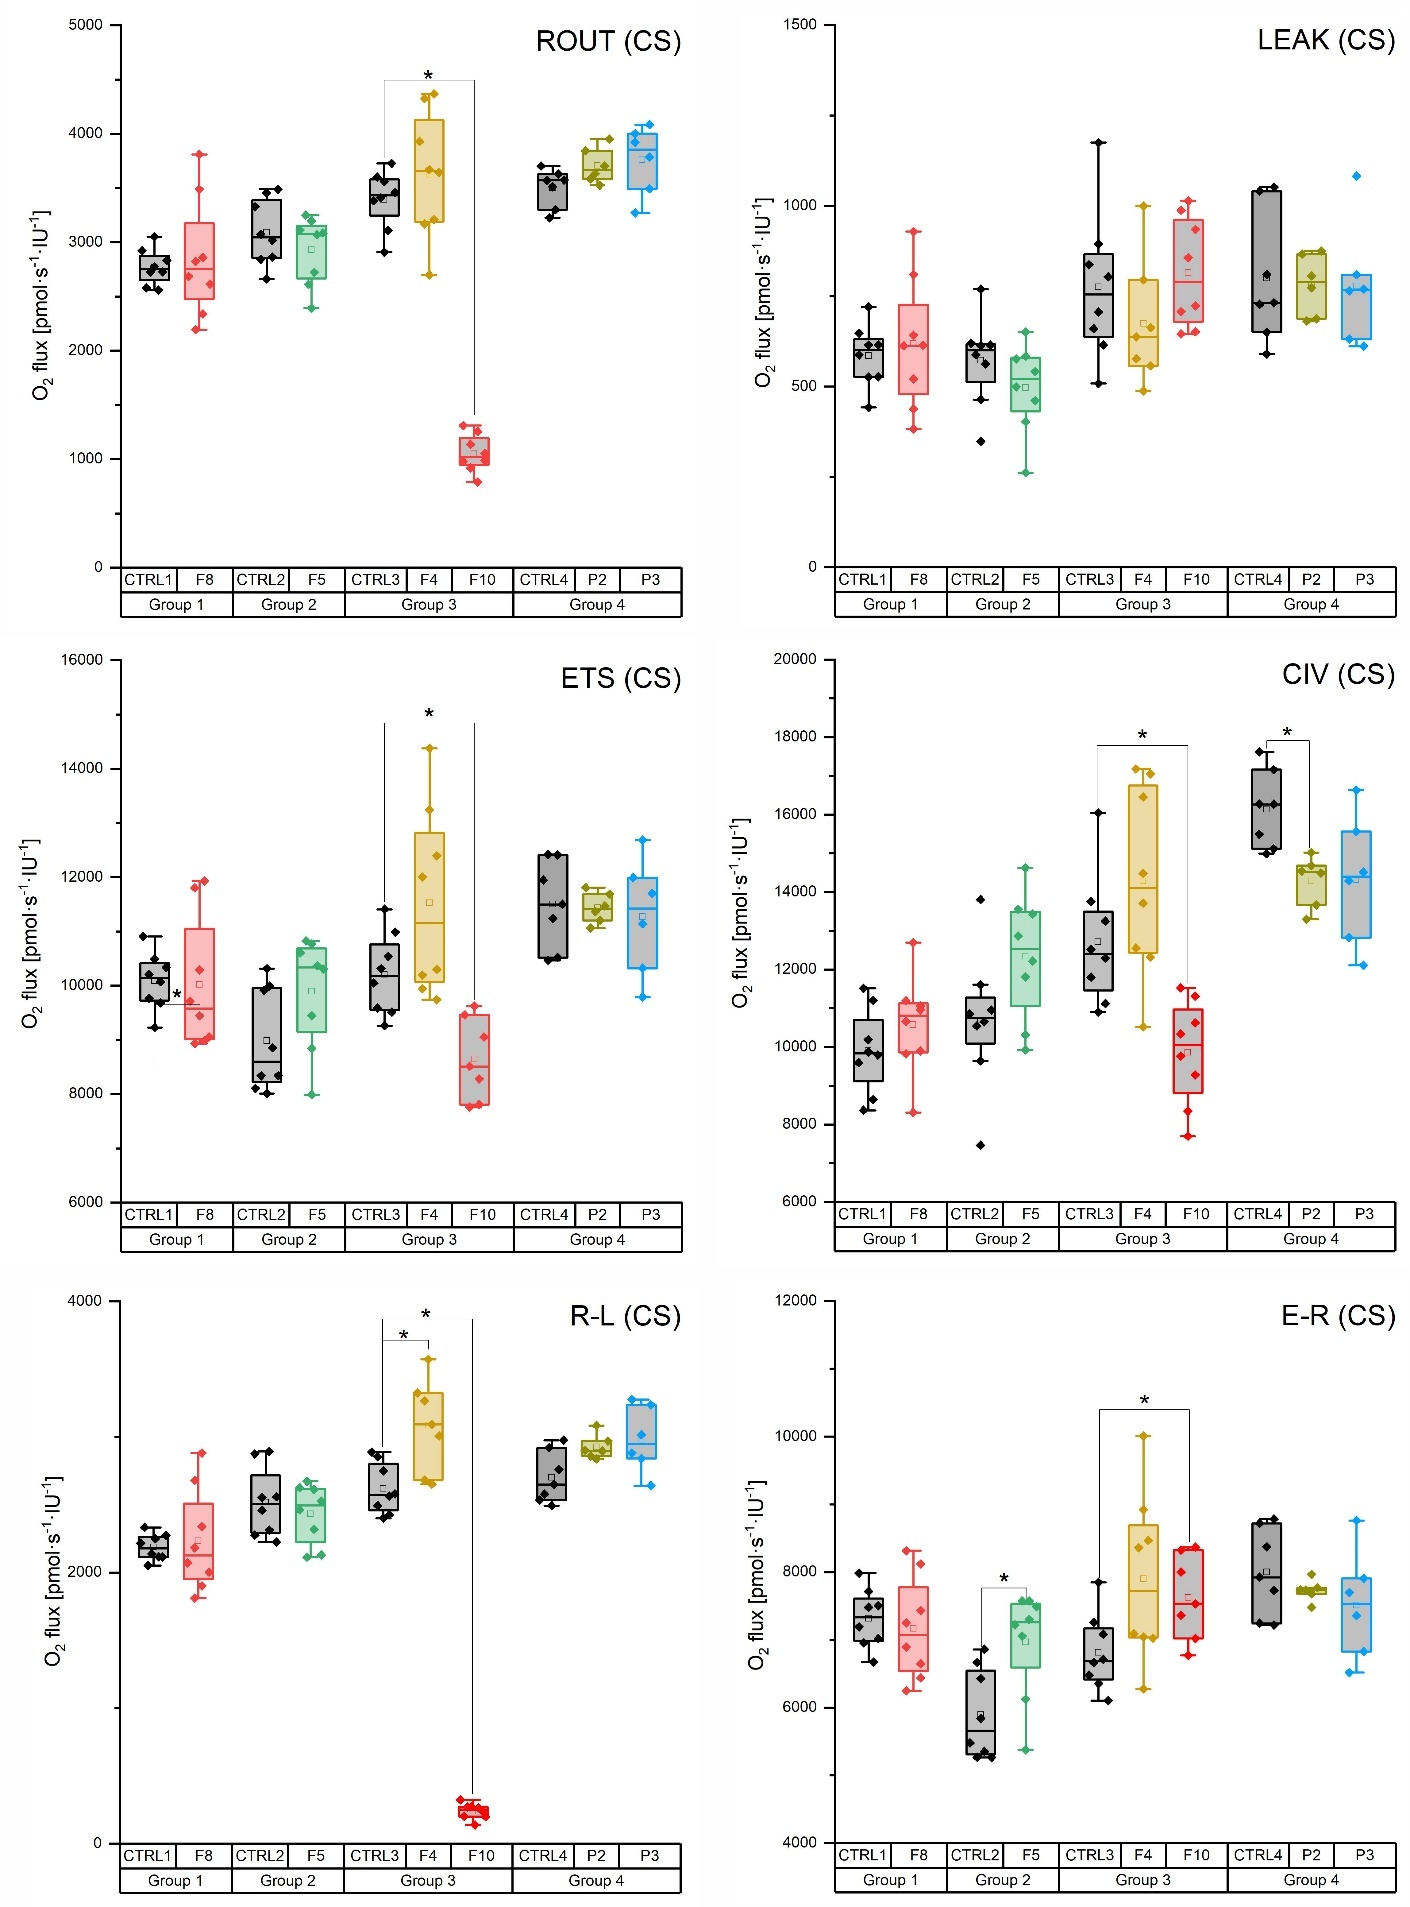


1. Results of High-Resolution Respirometry analysis (**expressed in pmol of O2/s/UI of CS enzyme).** In the plot box, data represents mitochondrial respiration (pmol of O2/s/cells) in various states: Routine respiration, LEAK, uncoupled (ETS) and complex IV capacity. Calculated states express reserve ETS capacity (E-R) and routine respiration corrected for LEAK representing ATP-related oxygen consumption (R-L) in control fibroblasts (CTRL) and cells co-cultivated with various plastics on day 7 of the experiment as a response on filament material.
